## **A multi-omic cohort as a reference point for promoting a healthy human gut microbiome**

**Authors:** Zhuye Jie<sup>1,2,3\*,†</sup>, Suisha Liang<sup>1,†</sup>, Qiuxia Ding<sup>1,†</sup>, Fei Li<sup>1</sup>, Shanmei Tang<sup>1</sup>, Dan Wang<sup>1</sup>, Yuxiang Lin<sup>1</sup>, Peishan Chen<sup>1</sup>, Kaiye Cai<sup>1</sup>, Xuemei Qiu<sup>1</sup>, Qiang Li<sup>1</sup>, Yunli Liao<sup>1</sup>, Dongsheng Zhou<sup>1</sup>, Heng Lian<sup>1</sup>, Yong Zuo<sup>1</sup>, Xiaomin Chen<sup>1</sup>, Weiqiao Rao<sup>1</sup>, Yan Ren<sup>1</sup>, Yuan Wang<sup>1</sup>, Jin Zi<sup>1</sup>, Rong Wang<sup>1</sup>, Hongcheng Zhou<sup>4</sup>, Haorong Lu<sup>4</sup>, Xiaohan Wang<sup>1</sup>, Wei Zhang<sup>1</sup>, Tao Zhang<sup>1,3</sup>, Liang Xiao<sup>1,5,6</sup>, Yang Zong<sup>1</sup>, Weibin Liu<sup>1</sup>, Huanming Yang<sup>1,7</sup>, Jian Wang<sup>1,7</sup>, Yong Hou<sup>1</sup>, Xiao Liu<sup>1</sup>, Karsten Kristiansen<sup>1,3</sup>, Huanzi Zhong<sup>1,3</sup>, Huijue Jia<sup>1,2,3,8,\*</sup>, Xun Xu<sup>1,\*</sup>

### **Affiliations:**

<sup>1</sup>BGI-Shenzhen, Shenzhen, China.

<sup>2</sup>Shenzhen Key Laboratory of Human Commensal Microorganisms and Health Research, BGI-Shenzhen, Shenzhen, China.

<sup>3</sup>Department of Biology, Ole Maaløes Vej 5, University of Copenhagen, Copenhagen, Denmark.

<sup>4</sup>China National Genebank, BGI-Shenzhen, Shenzhen 518120, China.

<sup>5</sup>Shenzhen Engineering Laboratory of Detection and Intervention of human intestinal microbiome, BGI-Shenzhen, Shenzhen, China.

<sup>6</sup>BGI-Qingdao, BGI-Shenzhen, Qingdao, 266555, China.

<sup>7</sup>James D. Watson Institute of Genome Sciences, Hangzhou, China.

<sup>8</sup>Macau University of Science and Technology, Avenida Wai long, Taipa, Macau, China.

\* To whom correspondence should be addressed. X.X. [xuxun@genomics.cn](mailto:xuxun@genomics.cn) ; Z.J.

[jiezhuye@genomics.cn](mailto:jiezhuye@genomics.cn); H.J. [jiahuijue@genomics.cn](mailto:jiahuijue@genomics.cn)

† These authors contributed equally to this work.

1 **Abstract:**

2 **More than a decade of gut microbiome studies have a common goal for human**  
3 **health. As most of the disease studies sample the elderly or the middle-aged, a**  
4 **reference cohort for young individuals has been lacking. It is also not clear what**  
5 **other omics data need to be measured to better understand the gut microbiome.**  
6 **Here we present high-depth metagenomic shotgun sequencing data for the fecal**  
7 **microbiome together with other omics data in a cohort of 2,183 adults, and observe**  
8 **a number of vitamins, hormones, amino acids and trace elements to correlate with**  
9 **the gut microbiome and cluster with T cell receptors. Associations with physical**  
10 **fitness, sleeping habits and dairy consumption are identified in this large multi-omic**  
11 **cohort. Many of the associations are validated in an additional cohort of 1,404**  
12 **individuals. Our comprehensive data are poised to advise future study designs to**  
13 **better understand and manage our gut microbiome both in population and in**  
14 **mechanistic investigations.**

15

16 The gut microbiome has been implicated in a growing list of complex diseases, showing  
17 great potential for the diagnosis and treatment of metabolic, autoimmune and  
18 neurological diseases as well as cancer. While case-control studies have been

19 illuminating<sup>1</sup>, recently published studies have emphasized difficulty in extrapolating to  
20 natural cohorts due to heterogeneity in location and ethnicity<sup>2,3</sup>. So far only a few cohorts  
21 made use of metagenomic shotgun sequencing instead of 16S rRNA gene amplicon  
22 sequencing, the largest being the LifeLines Deep cohort (n=1,135, 32 million reads per  
23 sample) from the Netherlands<sup>4-7</sup>. Fecal or plasma metabolites are more or less included  
24 in gut microbiome studies, but the conclusions usually did not go beyond short-chain  
25 fatty acids (SCFA), amino acids, vitamin B complex or bile acids. Levels of trace  
26 elements such as arsenic have been a health concern ([https://www.usgs.gov/mission-](https://www.usgs.gov/mission-areas/water-resources/science/arsenic-and-drinking-water?qt-science_center_objects=0#qt-science_center_objects)  
27 [areas/water-resources/science/arsenic-and-drinking-water?qt-](https://www.usgs.gov/mission-areas/water-resources/science/arsenic-and-drinking-water?qt-science_center_objects=0#qt-science_center_objects)  
28 [science\\_center\\_objects=0#qt-science\\_center\\_objects,](https://www.usgs.gov/mission-areas/water-resources/science/arsenic-and-drinking-water?qt-science_center_objects=0#qt-science_center_objects)  
29 <https://www.fda.gov/food/metals/arsenic-food-and-dietary-supplements>), but are  
30 unexplored in the microbiome field. Biological sex is a strong determinant for the gut  
31 microbiome in mice and livestock<sup>8-10</sup>. The impact of hormones on the human gut  
32 microbiome, or vice versa, remains unclear.

33 As part of the 4D-SZ (trans-omic, with more time points in future studies) cohort, here  
34 we present metagenomic shotgun sequencing data sufficient for high-resolution  
35 taxonomic and functional profiling ( $86.1 \pm 23.3$  million reads per sample) of the fecal  
36 microbiome in a cohort of 2,183 adults, along with questionnaire data, physical fitness  
37 tests, facial skin features, plasma metabolome and immune repertoire. Trans-omics  
38 analyses in this Han Chinese cohort put into context fecal microbiome disease markers,  
39 and uncover previously overlooked measurements such as aldosterone, testosterone, trace  
40 elements and vitamin A that influence the gut microbiome, which were validated in an  
41 additional cohort of 1,400 individuals. Trends for cardiometabolic diseases and colorectal

42 cancer can be seen, despite the average age of 29.6. This is also to our knowledge the  
43 largest cohort with facial skin data and immune repertoire data, which would also be of  
44 interest for general health management and disease studies.

45 A recent study casted doubt over the health benefits of probiotic consumption, concluding  
46 that colonization of the strains was highly variable between individuals <sup>11</sup>. Our large  
47 cohort unequivocally showed commercial yogurt strains, especially *Streptococcus*  
48 *thermophilus* and *Bifidobacterium animalis* in feces, and suggested beneficial effects in  
49 cardiometabolic health.

50

## 51 **Results**

### 52 **Comprehensive gut microbiome data together with other omics**

53 Fecal samples were collected during a physical examination, and 2,183 samples (Age,  
54  $29.6 \pm 5.5$ , average  $\pm$  stdev) were subjected to metagenomic shotgun sequencing, yielding  
55  $82.95 \pm 24.26$  million high-quality non-human reads per sample (Supplementary Table  
56 1a), ensuring accurate taxonomic and functional profiling. The reads were mapped to a  
57 comprehensive human gut microbiome reference gene catalog containing 9.9 million  
58 genes (with a saturating mapping rate of  $80.1 \pm 4.9$  %) and then assigned to 1,507  
59 Metagenomic Species (MGSs) <sup>12-14</sup> and 2,981 metagenomic linkage groups (MLGs,  
60 Kendall's tau instead of Pearson's or Spearman's correlation between genes) (Qin et al,  
61 2012, Jie et al, 2017), to include both known and unknown microbes.

62 Other omics data, including 104 plasma metabolites (3,980 samples), 634 immune  
63 indices (PBMC (Peripheral blood mononuclear cells) V(D)J usage and its shannon

64 diversity, 4,120 samples) from buffy coat, 72 basic medical data (body measurements and  
65 routine blood test, 2,715 samples), 49 facial skin imaging indices (2,049 samples), 24  
66 physical fitness data (3,833 samples), 18 entries from psychological questionnaire (2,039  
67 samples), and 56 entries from lifestyle questionnaire (3,820 samples) were collected from  
68 the same individuals (Fig. 1, Supplementary Tables 1b-d).

### 69 **The gut microbiome as a relatively independent dimension for health**

70 To get an overall idea of the relationship between omics, an inter-omics prediction value  
71 between omics data was calculated using a 5-fold cross-validated random forest model  
72 (RFCV, Fig. 2a). Basic medical data showed the highest global systematic association  
73 with other omics data. The accuracy of prediction from basic medical data to physical  
74 fitness data and from metabolites to basic medical data reaching 75% quantile showed  
75 RFCV  $R = 0.461$  and  $0.399$ , respectively (Fig. 2a, b, Supplementary Fig. 1). Basic  
76 medical data showed high prediction accuracy to metabolites (Fig. 2a, b); on the other  
77 hand, serum creatinine, BMI, waist to hip ratio, hematocrit and triglyceride in basic  
78 medical data can be predicted by metabolites (Fig. 2c). Metabolites constituted the  
79 highest prediction accuracy to immune indices ( $R = 0.292$ ) (Fig. 2b). Immune indices  
80 showed the second highest prediction accuracy to metabolites (Fig. 2a, b). Facial skin  
81 features can be predicted by basic medical data, metabolites, physical fitness data and  
82 lifestyle questionnaire (Fig. 2b, c). Among the lifestyle questionnaire, smoking, drinking  
83 (especially low concentration alcohol), sports habits (especially resistance training), high-  
84 sugar and high-fat dietary habit, and staying up until midnight can be predicted by other  
85 omics data (Fig. 2c).

86 A number of factors have been reported to explain gut microbial composition, while the  
87 total percentage of variance explained remained in single digits<sup>4,15</sup>. According to a  
88 RFCV predict model, we observe in this metagenomic cohort influence from lifestyle  
89 questionnaire factors such as defecation, yogurt, age, gender, smoking, milk, soymilk,  
90 drinking alcohol, fruit and vegetables on gut microbiome composition (Fig. 3), and the  
91 cumulative effect size was also in single digits (Supplementary Tables 2b,2c). The BMI  
92 distribution is narrow in this cohort ( $21.729 \pm 3.787$ , Supplementary Table 1b), so its  
93 effect size was 0.0015 (q-value=0.014, Supplementary Table 2b). ABO blood group  
94 could also predict fecal microbiome composition (RFCV R=0.2, Fig. 3), and specific  
95 differences include Lachospiraceae bacterium 3\_1\_46FAA in blood type A (q = 6.12E-5),  
96 *Ruminococcus torques* in blood type B (q = 1.59E-2), unnamed MGS209 in blood type  
97 AB (q = 1.59E-2) and *Megaspaera micronuciformis* in blood type O (q = 1.69E-2).

98 As our ‘other genome’, the gut microbiome could predict other omics in this cohort. Gut  
99 microbiome showed the greatest prediction power for metabolites, such as plasma  
100 vitamins (vitamin A, folic acid, vitamin B5, vitamin D), plasma hormones (testosterone,  
101 aldosterone), trace elements (mercury, selenium, arsenic) and plasma amino acids  
102 (branched chain amino acids (BCAA), glutamic acid, tryptophan, tyrosine, histidine,  
103 alanine) (Fig. 3). Interestingly, hand grip strength, vital capacity, speckles and pores on  
104 cheeks and staying up until midnight can also be predicted by the gut microbiome (Fig. 3).

105 We next included a validation cohort of 1404 individuals (mean age  $29.515 \pm 5.248$ , 480  
106 males and 570 females,  $82.95 \pm 24.26$  million high-quality non-human reads per fecal  
107 sample), which differed by hometown location compared to the initial cohort  
108 (Supplementary Table 1a, Supplementary Table 1b, Fig. 1). The gut microbiome could

109 also predict these plasma metabolites, with greater effects from mercury, cysteine,  
110 selenium, iron and cobalt (Fig. 3, Supplementary Table 3), while other data such as  
111 physical fitness tests and facial skin features are not available.

## 112 **Defecation, hormone and gender**

113 We see that gender (female 1,016, male 1,007) was one of the most significant factors to  
114 diverge gut microbiome composition (Supplementary Fig.2a). *Eubacterium dolichum*,  
115 and *Blautia wexlerae* were significantly more abundant in males (Supplementary Fig. 2a),  
116 after adjusting for age, BMI, medication and dietary supplements (Supplementary Table  
117 3b). *Fusobacterium mortiferum*, which positively associated with testosterone, was  
118 sensitive to the statistical adjustments (Supplementary Tables 3a, 3b). Compared to males,  
119 females showed a greater  $\alpha$ -diversity (Supplementary Table 2a, Supplementary Fig. 2c).  
120 *Bifidobacterium longum*, *B. bifidum*, and *B. catenulatum*, *B. pseudocatenulatum* were all  
121 significantly enriched in females, as well as potentially oral or vaginal bacteria such as  
122 *Streptococcus parasanguinis*, *Prevotella bivia* (Supplementary Fig. 2a). Gut microbial  
123 functional potential for secondary bile acids strongly associated with self-reported  
124 defecation frequency, which were better validated than associations with sex hormones  
125 (Supplementary Fig. 2b), suggesting that these are stable patterns.

126 Aldosterone, one of the major adrenal gland mineralcorticoid, positively correlated with  
127 bacteria implicated in cardiometabolic health, such as *Bacteroides intestinalis*, *B.*  
128 *cellulosilyticus*, *B. stercorisoris* and *Eubacterium eligens* (Supplementary Fig. 3) <sup>16</sup>. *E.*  
129 *eligens* and *Ruminococcus lactaris* scaled negatively with self-reported preference for a

130 salty diet, in contrast to *Blautia obeum* (Supplementary Fig. 2a), and mice on a high salt  
131 diet showed decrease in a number of commensal bacteria <sup>17</sup>.

### 132 **The metabolome-immune-gut axis**

133 Among the strongest associations between different omics is that between immune  
134 repertoire and plasma metabolites (Fig. 2). More strikingly, when we plotted the  
135 associations in detail, the clusters of metabolites corresponded either to the same *TRBV*  
136 (T-cell receptor beta variable gene) or to the same *TRBJ* (T-cell receptor beta joining  
137 gene) (Supplementary Fig. 4a). Vitamin A, 5-methyl four hydrogen folic acid, selenium,  
138 mercury and serum aldosterone showed positive associations with a few TRBJ1-4 and  
139 TRBJ2-1, and negative association with TRBJ2-4. Vitamin B5, Vitamin E, phosphoserine,  
140 arginosuccinic acid and arsenic showed positive associations with TRBJ1-4, as well as  
141 negative associations with TRBJ2-4, TRBV20-1 and TRBV3-1. Glutamic acid and serine  
142 showed a pattern that were largely opposite to that of the vitamin A cluster, except for  
143 negative associations with TRBV20-1.

144 We next explored how the gut microbiome might help put the metabolome-immune  
145 associations into context. Vitamin A is central to a healthy immune system but is  
146 typically studied for its role in early development <sup>18</sup>. A recent mice study reported  
147 modulation of retinol dehydrogenase 7 expression and dampened antimicrobial response  
148 in the gut by Clostridiales <sup>19</sup>. Consistently, we observed associations between Clostridia  
149 species (Clostridia MGS0123, MGS0560, MGS0558, Lachnospiraceae bacterium  
150 1\_4\_56FAA, Lachnospiraceae bacterium 6\_1\_63FAA, Lachnospiraceae bacterium  
151 9\_1\_43BFAA, *C. boltea*, *Clostridium* sp. AT4, *Clostridium* sp. M62.1) and vitamin A in  
152 adult humans both with Spearman's correlation and with Masaslin associated



153 (Supplementary Fig. 3, Supplementary Table 3a). 5-methyl four hydrogen folic acid  
154 exhibited a positive correlation with *Eubacterium eligens* (Supplementary Fig. 4a,  
155 Supplementary Fig. 3), a butyrate-producing bacterium that was relatively depleted in  
156 atherosclerotic cardiovascular disease<sup>16</sup>. 5-methyl four hydrogen folic acid also  
157 negatively associated with *Dorea* and *Blautia* species (Supplementary Fig. 4a), which  
158 have been implicated in obesity and could metabolize formate or hydrogen<sup>20–22</sup>  
159 (Supplementary Fig. 4a). Associations between the gut microbiome and trace elements  
160 including mercury, selenium and arsenic might be surprising (Supplementary Fig. 4a).  
161 Selenium-containing rice is commercially promoted as anti-cancer, and we found that the  
162 association pattern largely followed arsenic, consistent with these two trace elements’  
163 similar function in anaerobic respiration<sup>23</sup>. Selenium and mercury also correlated with  
164 disease-associated species such as *Clostridium bolteae* and *Ruminococcus gnavus* in the  
165 gut microbiome.

166 The metabolome-immune cluster represented by phosphoserine, and argininosuccinic  
167 acidnegatively associated with *Bacteroides coprophilus* (Supplementary Table 3i), a  
168 prevalent but not very abundant species from the *Bacteroides* genus. MGSs from  
169 *Faecalibacterium prausnitzii* (Supplementary Fig. 4a, Supplementary Fig. 3), a bacterium  
170 reported to produce butyrate and metabolize arsenic<sup>24</sup>, positively associated with  
171 L-homocitrulline, phosphoserine, negatively associated with vitamin A, mercury, as well  
172 as with specific TCR V(D)J including positive correlation with TRBV27\_TRBJ2.3 and  
173 TRBV27\_TRBJ2.5 and negative correlation with TRBV20–1:TRBJ2–4 (Supplementary  
174 Fig. 4a, Supplementary Table 3). The third cluster represented by glutamic acid showed  
175 negative associations with previously reported bacteria implicated with lower BMI such

176 as *Alistipes shahii*, *Bacteroides cellulosilyticus*, *Ruminococcus lactis* and *Eubacterium*  
177 *eligens*<sup>16</sup> in this large cohort (Supplementary Fig. 4a), consistent with higher glutamic  
178 acid in individuals with obesity or insulin resistance<sup>21,25</sup>, and here we tentatively  
179 identified their associated TCRs (Supplementary Fig. 4a).

180 Moreover, gut microbiome functional potential showed specific associations with TCR  
181 immune repertoire. The gut microbial module (GMM)<sup>26</sup> for homoacetogenesis  
182 (production of acetate from hydrogen and carbon dioxide) displayed widespread negative  
183 associations, most notably with TRBV7-8:TRBJ2-2 (Supplementary Fig. 4b). TRBV7-8  
184 frequency had been reported to be higher in Pima Indian individuals with Type 2 diabetes  
185<sup>27</sup> (Supplementary Table 3i). Modules for degradation of arginine and lysine, degradation  
186 of lactose and galactose, also associated with a number of VJs (Supplementary Fig. 4b).

187 In the validation cohort, associations with fecal microbiome modules such as lysine  
188 degradation, mucin degradation, lactose and galactose degradation, sulfate reduction were  
189 validated (Supplementary Fig. 4b, Supplementary Table 3f), which was impressive given  
190 the differences in trace metals and other metabolites between the two cohorts (Fig. 3,  
191 Supplementary Table 1). So, from both taxonomic and functional points-of-view, the gut  
192 microbiome is involved in the metabolome-immune interplay in circulation, with  
193 important new leads for experimental investigations.

#### 194 **Biomarkers for hyperuricemia and cardiometabolic diseases**

195 Hyperuricemia is common in the East Asian population, and urate is excreted in urine or  
196 through the gastrointestinal tract. In our cohort, serum uric acid showed negative  
197 correlations with gut bacteria such as *Faecalibacterium prausnitzii*, *Alistipes shahii*,  
198 *Oscillospiraceae* and *Bacteroides intestinalis* (Fig. 4), adjusted for medication and

199 dietary supplements. Moreover, serum uric acid positively correlated with vitamins  
200 (vitamin A, B5, D3 and E), amino acids (glutamic acid and alanine), trace elements  
201 (arsenic and mercury), while negatively associated with testosterone (Fig. 4). The  
202 negative associations between fecal *Butyricimonas virosa*, *Odoribacter splanchnicus* and  
203 plasma alanine were consistent with butyrate production from amino acids  
204 (Supplementary Table 3i)<sup>28,29</sup>, which together with methylhistidines hinted at a meat-  
205 excess diet<sup>30</sup>. Self-reported dietary structure indeed showed association with serum uric  
206 acid (Supplementary Table 3j). This is the first set of large-scale evidence for gut  
207 microbiome dysbiosis in hyperuricemia, together with hormonal, metabolic and  
208 potentially immunological differences.

209 We next defined a score according to 8 routine blood parameters and 80 fecal  
210 microbiome features for cardiometabolic disease risk (see Methods) in this young cohort  
211 and tested it in previously published case-control samples. With the fecal markers alone,  
212 metagenomic samples from Chinese patients with atherosclerotic cardiovascular disease  
213 (ACVD), liver cirrhosis, obesity and Crohn's disease all scored higher compared to  
214 control samples without the disease ( $P < 0.05$ ) (Supplementary Fig. 5a), while those from  
215 diseases such as colorectal cancer, rheumatoid arthritis and medication-unstratified T2D  
216 did not (Supplementary Fig. 5a)<sup>16,21,31-35</sup>. The clinical parameters help clarified T2D and  
217 Crohn's disease (Supplementary Fig. 5b). Thus, although regional differences and  
218 misidentifications remain a concern, we illustrate the potential for population-wide  
219 screens of cardiometabolic diseases using the fecal microbiome.

## 220 **Biomarkers for colorectal cancer**

221 This young multi-omic cohort also provide more insight into the relationship between gut  
222 microbiome, plasma metabolome and colorectal cancer (CRC). Both the microbiome and  
223 the plasma metabolome are being actively studied for CRC biomarkers, but to our  
224 knowledge they have not been investigated in the same cohort. We see here that  
225 previously reported CRC-enriched bacteria <sup>1,33,36,37</sup> showed associations with plasma  
226 metabolites regardless of statistical adjustment for covariates (Supplementary Table 3a).  
227 *Peptostreptococcus stomatis* positively associated with plasma leucine, phenylalanine,  
228 alanine, tyrosine, as well as sarcosine, a metabolite studied for prostate cancer and a  
229 degradation intermediate of glycine betaine <sup>38,39</sup> (Supplementary Fig. 6).  
230 Enterobacteriaceae including *Escherichia coli*, *Klebsiella pneumoniae*, *Enterobacter*  
231 *cloacae* and *Citrobacter freundii* positively associated with sarcosine, hydroxylysine,  
232 branched chain amino acids, tyrosine, tryptophan, 1-methylhistidine, hydroxyproline,  
233 and argininosuccinic acid (Supplementary Fig. 6). 1-methylhistidine is a marker for  
234 habitual meat intake, especially red meat <sup>30</sup>. Bacteria such as *Bacteroides*  
235 *thetaiotaomicron*, *Butyricimonas virosa* were more associated with 3-methylhistidine  
236 (Supplementary Table 3a). Besides, the butyrate-producing *E. eligens* positively  
237 associated with fruit and vegetable intake, while negatively associated with plasma  
238 alanine (Fig. 4a, Supplementary Fig. 6). A number of these associations were also  
239 observed in the validation cohort, e.g. *Enterobacter cloacae* and hydroxylysine, *E.*  
240 *eligens* and alanine (Supplementary Table 3a). These results corroborate fecal markers of  
241 CRC with plasma metabolites, and suggest further studies on the long-term interplay  
242 between dietary metabolites and bacteria for CRC etiology and threshold for intervention.

243 **Physical fitness, exercising and sleeping reflected in the gut microbiome**

244 Vital capacity, a commonly used index to assess lung function, positively associated with  
245 bacteria such as *A. shahii*, *F. prausnitzii* and *Bifidobacterium adolescentis*, while  
246 negatively correlated with disease-related bacteria including *Clostridium clostridioforme*,  
247 *Ruminococcus gnavus* and *E. coli*, regardless of statistical adjustments (Fig. 2, Fig. 5,  
248 Supplementary Table 3e). Hand grip strength, a protective factor for cardiovascular  
249 casualty<sup>40</sup>, negatively associated with *E. coli* (Fig. 5). Age and sex stratified vertical  
250 jump score (Supplementary Table 4) negatively associated with *E. coli*, while positively  
251 associated with *B. cellulosilyticus*, *B. intestinalis*, *Eubacterium rectale*, etc. *Bacteroides*  
252 *cellulosilyticus* and *B. stercorisoris*, which associated with exercise intensity, even  
253 correlated with a faster reaction time (Fig. 5), reminding us with associations between *B.*  
254 *cellulosilyticus* and aldosterone, *B. stercorisoris* and folic acid in both cohorts  
255 (Supplementary Table 3a). Moreover, gut microbiome diversity (Shannon index)  
256 associated with favorable scores in most of the fitness tests (Supplementary Table 2a).  
257 Besides, individuals who stay up until after midnight also showed negative correlations  
258 with *Holdemania filiformis*, *Veillonella atypica* and 25-hydroxy vitamin D3/D, while  
259 positively correlated with *Clostridium hathewayi*, *Clostridium phoceensis*, mercury,  
260 selenium, arsenic, vitamin A, hydroxyproline and phosphoserine (Supplementary Fig. 2a,  
261 Supplementary Fig. 5, Supplementary Table 3b). Thus, sleeping is also a factor to  
262 consider for a complete understanding of the gut microbiome.

### 263 **Species from yogurt in the healthy gut microbiome**

264 Besides defecation frequency and gender, yogurt consumption explained a notable  
265 portion of variances in the gut microbiome (Fig. 3, Supplementary Table 2b). A recent  
266 study casted doubt over the health benefits of probiotics, concluding that colonization of

267 the bacteria was highly variable between individuals<sup>11</sup>. In both our large cohorts,  
268 *Streptococcus thermophilus*, a species included in commercial yogurt mainly for its  
269 thermal stability and metabolic support for other strains, was consistently detected in  
270 yogurt eaters, and scaled with self-reported frequency of yogurt consumption (Fig. 6,  
271 Supplementary Fig. 7). *Bifidobacterium animalis*, likely representing the star strain from  
272 CHR HANSEN, *B. animalis* subsp. lactis BB-12, was also enriched in yogurt eaters, and  
273 fecal relative abundance of *B. animalis* associated with less stress, less bilirubin, lower  
274 diastolic blood pressure, as well as with TCR V(D)J combinations (Fig. 6d), suggesting  
275 immune modulation. The association between *B. animalis* and TRBV5.6:TRBJ2.5 was  
276 also observed in the validation cohort (Supplementary Table 3c), while the other  
277 parameters were unfortunately not available. In contrast to *S. thermophilus*, *B. animalis*,  
278 and *Veillonella*, there was no significant increase in any *Lactobacillus* strains (Fig. 6).  
279 Those who used to take yogurt also showed less *Clostridium bolteae*, a bacterium known  
280 to be elevated in a number of cardiometabolic diseases<sup>1,16</sup>. Intriguingly, fecal *C. bolteae*  
281 associated with plasma triglyceride, uric acid, phosphoserine, vitamin A, and mercury  
282 (Fig. 6e), offering an explanation for epidemiological evidence of yogurt consumption  
283 and reduced risk of gout<sup>41</sup>. In the validation cohort, *C. bolteae* also associated with  
284 mercury and to a lesser extent vitamin A (the vitamin A association was sensitive to  
285 covariates, Supplementary Table 3a). Besides, yogurt consumption was associated with a  
286 number of favorable measurements such as higher HDL (high-density lipoprotein)  
287 cholesterols, lower uric acid and triglycerides, less cysteine, mercury and hydroxyproline  
288 (Fig. 6a).

289 Regarding *Bifidobacterium* in the gut microbiome, however, individuals who consumed  
290 milk enriched for *B. longum*, *B. catenulatum* and *B. pseudocatenulatum* (Fig. 6a, b),  
291 implying that some of the yogurt-associated differences come from its exogenous strains  
292 such as *S. thermophilus* and *B. animalis*, as well as less *C. bolteae*. The higher  
293 *Bifidobacterium* spp., and lower *Blautia wexlerae* and *Ruminococcus* sp. 5\_1\_39BFAA  
294 associated with milk intake were validated in the additional 1404 individuals  
295 (Supplementary Table 3). Milk drinking also associated with vitamin B2, B5, B6, HDL,  
296 lymphocytes, etc. in the blood, vital capacity, and psychological scores (Fig. 6a, b,  
297 Supplementary Fig. 7).

298

## 299 **Discussion**

### 300 **Insights from multi-omics**

301 In summary, our trans-omic investigation of thousands volunteers establish an  
302 unprecedented reference data set for the human gut microbiome. Judging from the  
303 associations, it appears as though a number of factors in circulation crosstalk with the gut  
304 microbiome, and then manifest on the face, in the head and in fitness tests. Levels of trace  
305 elements, such as mercury, arsenic and selenium, as important cofactors for bacteria  
306 respiration and other functions<sup>23</sup>, should be measured even in uncontaminated regions,  
307 and in individuals showing normal levels of these elements. Although rice is often  
308 studied for such contaminants, exposure can be from other food, drink, air and soil  
309 sources<sup>42</sup>(<https://www.fda.gov/food/metals/arsenic-food-and-dietary-supplements>). Our  
310 results suggest that commensal microbial metabolism of trace elements might help  
311 determine their levels in the blood, and influence immune functions.

312 The PBMC TCR $\beta$  CDR3 V(D)J usage in such a large cohort is a great resource for  
313 discovering microbial antigens other than those from traditional pathogens. While some  
314 *TRBV* and *TRBJ* segments are more frequent than others<sup>43</sup>, we do not yet know how they  
315 correspond to T cell sub-populations. Existing studies on TCR have been focusing on  
316 pathogens, autoimmune diseases and cancer. For example, TCR profiles of tumor-  
317 resident T<sub>reg</sub> (regulatory T) cells have been shown to significantly overlap with those of  
318 circulating T<sub>reg</sub> cells<sup>44</sup>; immune phenotype of peripheral blood T<sub>reg</sub> II cells was not only  
319 similar to that of intratumoral T<sub>reg</sub> cells, but also predicted future relapse of breast cancer  
320 patients<sup>45</sup>. A high diversity in the T cell immune repertoire is believed to be preferable,  
321 but the T cell immune repertoire diversity has been reported to be unchanged after a 3-  
322 month switch from omnivorous to vegetarian and lower in long-term vegetarians<sup>46</sup>. In  
323 our analyses of this cohort, the overall diversity (Immunity index, Methods) was not the  
324 most important factor that predicted other omics, yet could be reflected by metabolites,  
325 physical fitness tests, lifestyle and skin features (RFCV R ~ 0.2, Fig. 2,3). We identify  
326 clustering patterns of specific TCR $\beta$  CDR3 VJ joining with plasma metabolites including  
327 vitamins, trace elements and amino acids (Supplementary Fig. 4a). The chains of  
328 causality remain to be fully elucidated; yet, it is likely to be a two-way interplay for  
329 metabolite-gut microbiome, metabolite-T cells, and gut microbiome-T cells. Our results  
330 imply long-term differences in these features in apparently healthy individuals. A similar  
331 speculation could be made for facial skin features, which we expect to be resilient against  
332 topical interventions judging from the strong associations with blood parameters.

333 We have tentatively identified gut bacteria associated with each ABO blood type. A  
334 larger proportion of blood type A in Europeans compared to East Asians might help



335 explain the greater abundance of Lachospiraceae bacterium<sup>12,47</sup>. Blood type B is more  
336 prevalent in northern Chinese, and the blood type B-enriched mucin-degrading bacterium  
337 *R. torques* has recently been reported to show an association with blood glucose<sup>48</sup> and  
338 was also associated with ulcerative colitis<sup>49</sup> and a Bristol stool score of 1 or 2  
339 (Supplementary Fig. 2a). *Megaspaera micronuciformis*, seen in association with blood  
340 type O, can produce butyrate from acetate<sup>50</sup>. Genetic studies of the gut microbiota have  
341 not yet reported genome-wide significant associations with ABO blood type genes  
342 themselves<sup>51-54</sup>, while multiple studies have reported impact of *FUT2* secretor/non-  
343 secretor status on gut microbiota composition<sup>55-57</sup>. Tentative associations here are yet to  
344 be matched with *in vitro* studies with the glycans<sup>58,59</sup>.

345 Differences in gut microbiome composition between sexes and a greater microbial  
346 diversity in females have recently been reported in the LifeLines Deep cohort, yet the gut  
347 microbiome in females was influenced by oral contraceptives, ovariectomy as well as  
348 antibiotics for vaginal or pelvic infections<sup>60</sup>. Males of Hadza hunter-gatherers showed  
349 differences in gut microbiota compared to females<sup>61</sup>, including higher *Eubacterium*  
350 and *Blautia* in men which were also recapitulated in our Chinese cohort (*E. dolichum*, *B.*  
351 *wexlerae*). Interestingly, *E. dolichum* associated with a dietary structure of more meat  
352 instead of fruit and vegetables, while *B. wexlerae* scaled negatively with milk  
353 consumption (Supplementary Fig. 2, Fig. 6). The evolutionary implications remain  
354 unclear.

### 355 **A baseline of the gut microbiome with deviations towards diseases**

356 Metagenome-wide association studies (MWAS) have documented gut microbial  
357 perturbations in a growing list of diseases by comparing cases versus controls. Here we

358 provide a high-depth metagenomic cohort, the mean age for which did not exceed 30  
359 years old. Alarming enough, trends for cardiometabolic diseases and colorectal cancer  
360 can already be seen from the fecal microbiome and a few parameters in the blood. The  
361 set of healthy gut microbes for leanness are increasingly clear<sup>16</sup>, such as *A. shahii*, *F.*  
362 *prausnitzii*, *E. eligens* and *B. cellulosilyticus*. And we have a better idea how to increase  
363 their relative abundances. Interestingly, we observed few association with *Akkermansia*,  
364 which may indeed be too diverse among individuals<sup>5,62</sup> or require mucosal sampling. The  
365 list of potentially harmful gut microbes are also increasingly clear; future studies are  
366 needed to confirm whether we can decrease *E. coli* and *R. gnavus* with exercising and  
367 diet, fend off *C. boltae* with yogurt, etc.

368 While an older cohort would be needed to look at type 2 diabetes<sup>63,64</sup>, hyperuricemia is  
369 common in this cohort (Supplementary Table 1). *A. shahii* negatively associated with  
370 plasma tryptophan (Fig. 4, Supplementary Table 3i), and hyperuricemia has been  
371 reported to skew tryptophan metabolism towards kynurenine production in mice models  
372<sup>65</sup>, instead of indole reported for *A. shahii*<sup>66</sup>, potentially modulating signaling through  
373 aryl hydrocarbon receptors (AhR)<sup>67</sup>. One of the bacteria negatively associated with  
374 serum uric acid, *F. prausnitzii*, has been reported to encode a methyltransferase for  
375 arsenic detoxification (Supplementary Table 3i)<sup>24</sup>. IL-1 $\beta$ , the major cytokine responsible  
376 for gout<sup>68</sup>, has been associated with urinary level of arsenic<sup>69</sup>. Co-stimulation of patient-  
377 derived PBMCs with monosodium urate crystals and TLR2 or TLR4 (toll-like receptors)  
378 ligands have been shown to disrupt IL-1 $\beta$ / IL-1Ra (IL1 receptor antagonist) balance<sup>70</sup>,  
379 consistent with involvement of microbes in gout.

380 Genetic potential for histidine degradation instead of synthesis have been observed to  
381 increase in CRC relative to healthy controls according to metagenomic studies<sup>37,71</sup>. 1-  
382 methylhistidine, a marker for habitual meat intake<sup>30</sup>, could be metabolized into histidine.  
383 Plasma level of the amino acid proline was reported to increase in a mouse model of  
384 CRC<sup>72</sup>, but found in another study to decrease in human CRC<sup>73</sup>. In this young cohort  
385 from China, we did not see significant associations between proline and known gut  
386 microbiome markers of CRC. Hydroxyproline, on the other hand, is better predicted by  
387 the gut microbiome composition compared to proline (Fig. 3), and associated with meat  
388 consumption, staying up until after 0 am (Supplementary Fig. 7). Enterobacteriaceae such  
389 as *Escherichia coli* and *Klebsiella pneumoniae* positively associated with hydroxyproline  
390 in this cohort. A recent study analyzed fecal metabolites together with fecal microbiome  
391 and reported among others an increase in branched chain amino acids and aromatic amino  
392 acids in CRC<sup>74</sup>. Here we observe plasma levels of these amino acids to associate with  
393 CRC markers such as *P. stomatis*, and *E. coli*, while the fecal metagenomic potential for  
394 leucine biosynthesis was control-enriched<sup>37,74</sup>, implying that leucine was normally not in  
395 excess.

396 We also find it intriguing that decarboxylases appear generally important for bacterial  
397 stress response in the microbiome, i.e. to maintain a balanced pH for themselves. The top  
398 one for gut microbes may be glutamate decarboxylase (produces GABA ( $\gamma$ -aminobutyric  
399 acid) from glutamate), while histidine decarboxylase in the female reproductive tract  
400 might contribute to menstrual pains<sup>75</sup>. Besides, recent studies identified tyrosine  
401 decarboxylases in gut microbes that could digest the medication levodopa used to treat  
402 Parkinson's disease<sup>76,77</sup>.

### 403 **Behavioral changes to be trialed for a healthy gut microbiome?**

404 Although effects of sleep fragmentation on hemopoiesis have been seen despite antibiotic  
405 treatment <sup>78</sup>, our results nonetheless suggest that the gut microbiome may have an  
406 additional role, together with trace elements, vitamins, and host genetics <sup>79</sup>. The less  
407 hypocretin in mice subjected to sleep fragmentation promoted atherosclerosis <sup>78</sup>. The  
408 increased adiposity and decreased lean mass with sleep loss also involved toll-like  
409 receptors (TLRs) <sup>80,81</sup>, and we identify cardiometabolic disease-associated species  
410 including *Clostridium hatheway* here.

411 Potential influence of physical activity on the gut microbiota has been analyzed in small  
412 cohorts of rugby athletes <sup>82</sup> and colorectal cancer <sup>37</sup>. Although more detailed information  
413 for physical activity is preferable, compliance to recordings such as Fitbit is notoriously  
414 bad in healthy individuals <sup>83</sup>. Results from this large cohort at least suggest that  
415 exercising might help improve cardio-pulmonary function (grip strength, vital capacity)  
416 to decrease incidence of cardiometabolic diseases. Intense exercise, explored for  
417 application to individuals with diseases such as prediabetics and Alzheimer's <sup>84,85</sup>, may be  
418 no less important than endurance or resistance training; and our results suggest that  
419 different types of exercise could have differential impacts on the gut microbiome and the  
420 microbiome changes could be a readout for monitoring effects of training. Endurance  
421 training actually lowers testosterone <sup>86</sup> and could lead to hyperuricemia, especially if  
422 combined with high-fructose food and drinks and lack of dairy consumption <sup>41</sup>.

423 Our large-scale analyses provide substantial support for health benefits of yogurt  
424 consumption. The universally present species were *Streptococcus thermophilus* and  
425 *Bifidobacterium animalis* instead of commonly tested probiotics from *Lactobacillus*. An

426 orally administered strain of *B. longum* has been shown to persist in 30% of individuals  
427 for at least 6 months<sup>87</sup>, while we failed to detect in feces an *L. casei* strain gavaged to  
428 rats<sup>88,89</sup>, suggesting general differences between *Bifidobacterium* and *Lactobacillus*. The  
429 strains used by Zmora et al. included a number of *Lactobacillus*, *Bifidobacterium*, as well  
430 as *Streptococcus* and *Lactococcus*, all detectable in various gastrointestinal sites despite  
431 laxative and colonoscopy<sup>11</sup>. One potential explanation for the association with desirable  
432 cardiometabolic and psychological scores observed in our study for yogurt or milk is the  
433 production of metabolites such as folate and GABA by *S. thermophilus*, *Bifidobacterium*  
434 and *Lactobacillus*<sup>90,91</sup>. Moreover, Lactobacilli have been reported to sequester heavy  
435 metals including lead and cadmium<sup>92</sup>. All of these live or dead probiotics could  
436 potentially exert functions on the immune system or even the brain. The positive  
437 association with endogenous *Bifidobacterium* species with milk intake is more likely due  
438 to live bacteria which help metabolize the lactose in this largely lactose-intolerant  
439 population. It remains to be seen whether and how dairy consumption affects the gut  
440 microbiome in other cohorts, and there appears to be regional differences in China  
441 already.

442 Thus, this study provides a young reference for the gut microbiome with physical fitness  
443 test and questionnaire data, and reveals interrelationship with other omics such as trace  
444 elements, hormones and immune repertoire that have so far not been included in other  
445 study designs. There is a lot more to investigate both in vitro and in vivo by researchers  
446 across disciplines. Interventional as well as mechanistic studies will be needed to see how  
447 physical activity, well-timed sleeping and dietary interventions such as yogurt, milk and

448 vegetables might improve the gut microbiome, hormone levels, cardiometabolic and  
449 mental health.

450

451 **Data and materials availability:** Metagenomic sequencing data for all samples have  
452 been deposited to the CNSA (<https://db.cngb.org/cnsa/>) of (CNGB) database under the  
453 accession code CNP00 00426, CNP0000289.

454

#### 455 **Acknowledgments**

456 The authors are very grateful to colleagues at BGI-Shenzhen and China National  
457 Genebank (CNGB), Shenzhen for sample collection, DNA extraction, library  
458 construction, sequencing, and discussions. We thank Dr. Qiang Sun (University of  
459 Toronto), our colleagues Chen Chen and Yanmei Ju, Jinghua Wu for helpful comments.

460

#### 461 **Author contributions:**

462 J.W. initiated the overall health project. Y.Z., H.Z., K.C., P.C., X.X. organized the  
463 sample collection and processing, with immune repertoire from X.L., W.Z, metabolomics  
464 from X.Q., Q.L., Y.L., D.Z., H.Lian, Y.Z., X.C., W.R., Y.R., Y.W., J.Z., R.W., raw  
465 metagenomic profile from Q.D, X.W., and J.Z., Q.D., S.T., Y.L., D.W. checked the host  
466 metadata and matched the omics data. H.Zhou, H.Lu led the DNA extraction and  
467 sequencing, respectively. Z.J. led the bioinformatic analyses, including S.L. and F.L.  
468 H.Zhong, Q.D., S.T., D.W. performed early analyses which are not included in the

469 manuscript. Z.J., H.J. interpreted the data. H.J., S.L., Z.J., F.L. wrote the manuscript and  
470 rendered the display items. All authors contributed to finalizing this manuscript.

471

472 **Competing interests:** The authors declare no competing financial interest.

473

474 **References:**

- 475 1. Wang, J. & Jia, H. Metagenome-wide association studies: fine-mining the  
476 microbiome. *Nat. Rev. Microbiol.* **14**, 508–522 (2016).
- 477 2. He, Y. *et al.* Regional variation limits applications of healthy gut microbiome  
478 reference ranges and disease models. *Nat. Med.* **24**, 1532–1535 (2018).
- 479 3. Deschasaux, M. *et al.* Depicting the composition of gut microbiota in a population  
480 with varied ethnic origins but shared geography. *Nat. Med.* (2018) doi:10.1038/s41591-  
481 018-0160-1.
- 482 4. Zhernakova, A. *et al.* Population-based metagenomics analysis reveals markers  
483 for gut microbiome composition and diversity. *Science* **352**, 565–569 (2016).
- 484 5. Xie, H. *et al.* Shotgun Metagenomics of 250 Adult Twins Reveals Genetic and  
485 Environmental Impacts on the Gut Microbiome. *Cell Syst.* **3**, 572-584.e3 (2016).
- 486 6. Rothschild, D. *et al.* Environment dominates over host genetics in shaping human  
487 gut microbiota. *Nature* **555**, 210–215 (2018).
- 488 7. Mehta, R. S. *et al.* Stability of the human faecal microbiome in a cohort of adult  
489 men. *Nat. Microbiol.* **3**, 347–355 (2018).
- 490 8. Xiao, L. *et al.* A catalog of the mouse gut metagenome. *Nat. Biotechnol.* **33**,  
491 1103–1108 (2015).
- 492 9. Xiao, L. *et al.* A reference gene catalogue of the pig gut microbiome. *Nat.*  
493 *Microbiol.* **1**, 16161 (2016).
- 494 10. Zhao, L. *et al.* Quantitative genetic background of the host influences gut  
495 microbiomes in chickens. *Sci. Rep.* **3**, 1163 (2013).
- 496 11. Zmora, N. *et al.* Personalized Gut Mucosal Colonization Resistance to Empiric  
497 Probiotics Is Associated with Unique Host and Microbiome Features. *Cell* **174**, 1388-  
498 1405.e21 (2018).
- 499 12. Li, J. *et al.* An integrated catalog of reference genes in the human gut microbiome.  
500 *Nat. Biotechnol.* **32**, 834–841 (2014).
- 501 13. Nielsen, H. B. *et al.* Identification and assembly of genomes and genetic elements  
502 in complex metagenomic samples without using reference genomes. *Nat. Biotechnol.* **32**,  
503 822–828 (2014).
- 504 14. Moll1, J. M. *et al.* Pathway-based approach to classify unannotated gut bacteria  
505 associated with insulin sensitivity. *Revis. Nat Microbiol* (2019).

- 506 15. Falony, G. *et al.* Population-level analysis of gut microbiome variation. *Science*  
507 **352**, 560–564 (2016).
- 508 16. Jie, Z. *et al.* The gut microbiome in atherosclerotic cardiovascular disease. *Nat.*  
509 *Commun.* **8**, 845 (2017).
- 510 17. Wilck, N. *et al.* Salt-responsive gut commensal modulates TH17 axis and disease.  
511 *Nature* **551**, 585–589 (2017).
- 512 18. Veldhoen, M. & Ferreira, C. Influence of nutrient-derived metabolites on  
513 lymphocyte immunity. *Nat. Med.* **21**, 709–718 (2015).
- 514 19. Grizotte-Lake, M. *et al.* Commensals Suppress Intestinal Epithelial Cell Retinoic  
515 Acid Synthesis to Regulate Interleukin-22 Activity and Prevent Microbial Dysbiosis.  
516 *Immunity* **49**, 1103–1115.e6 (2018).
- 517 20. Lawson, P. A. *et al.* Reclassification of *Eubacterium formicigenerans* Holdeman  
518 and Moore 1974 as *Dorea formicigenerans* gen. nov., comb. nov., and description of  
519 *Dorea longicatena* sp. nov., isolated from human faeces. *Int. J. Syst. Evol. Microbiol.* **52**,  
520 423–428 (2002).
- 521 21. Liu, R. *et al.* Gut microbiome and serum metabolome alterations in obesity and  
522 after weight-loss intervention. *Nat. Med.* **23**, 859–868 (2017).
- 523 22. Beaumont, M. *et al.* Heritable components of the human fecal microbiome are  
524 associated with visceral fat. *Genome Biol.* **17**, 189 (2016).
- 525 23. Stolz, J. F. & Oremland, R. S. Bacterial respiration of arsenic and selenium.  
526 *FEMS Microbiol. Rev.* **23**, 615–27 (1999).
- 527 24. Coryell, M., McAlpine, M., Pinkham, N. V., McDermott, T. R. & Walk, S. T. The  
528 gut microbiome is required for full protection against acute arsenic toxicity in mouse  
529 models. *Nat. Commun.* **9**, 5424 (2018).
- 530 25. Cheng, S. *et al.* Metabolite profiling identifies pathways associated with  
531 metabolic risk in humans. *Circulation* **125**, 2222–31 (2012).
- 532 26. Vieira-Silva, S. *et al.* Species–function relationships shape ecological properties  
533 of the human gut microbiome. *Nat. Microbiol.* **29**, 16088 (2016).
- 534 27. Frankl, J. A., Thearle, M. S., Desmarais, C., Bogardus, C. & Krakoff, J. T-cell  
535 receptor repertoire variation may be associated with type 2 diabetes mellitus in humans.  
536 *Diabetes Metab. Res. Rev.* **32**, 297–307 (2016).
- 537 28. Sakamoto, M. *et al.* *Butyricimonas synergistica* gen. nov., sp. nov. and  
538 *Butyricimonas virosa* sp. nov., butyric acid-producing bacteria in the family  
539 ‘Porphyromonadaceae’ isolated from rat faeces. *Int. J. Syst. Evol. Microbiol.* **59**, 1748–  
540 1753 (2009).
- 541 29. Vital, M., Howe, A. C. & Tiedje, J. M. Revealing the bacterial butyrate synthesis  
542 pathways by analyzing (meta)genomic data. *mBio* **5**, e00889 (2014).
- 543 30. Mitry, P. *et al.* Plasma concentrations of anserine, carnosine and pi-  
544 methylhistidine as biomarkers of habitual meat consumption. *Eur. J. Clin. Nutr.* **73**, 692–  
545 702 (2019).
- 546 31. He, Q. *et al.* Two distinct metacommunities characterize the gut microbiota in  
547 Crohn’s disease patients. *GigaScience* **6**, 1–11 (2017).
- 548 32. Qin, N. *et al.* Alterations of the human gut microbiome in liver cirrhosis. *Nature*  
549 **513**, 59–64 (2014).
- 550 33. Yu, J. *et al.* Metagenomic analysis of faecal microbiome as a tool towards  
551 targeted non-invasive biomarkers for colorectal cancer. *Gut* **66**, 70–78 (2017).



- 552 34. Zhang, X. *et al.* The oral and gut microbiomes are perturbed in rheumatoid  
553 arthritis and partly normalized after treatment. *Nat. Med.* **21**, 895–905 (2015).
- 554 35. Qin, J. *et al.* A metagenome-wide association study of gut microbiota in type 2  
555 diabetes. *Nature* **490**, 55–60 (2012).
- 556 36. Zeller, G. *et al.* Potential of fecal microbiota for early-stage detection of colorectal  
557 cancer. *Mol. Syst. Biol.* **10**, 766 (2014).
- 558 37. Feng, Q. *et al.* Gut microbiome development along the colorectal adenoma–  
559 carcinoma sequence. *Nat. Commun.* **6**, 6528 (2015).
- 560 38. Sreekumar, A. *et al.* Metabolomic profiles delineate potential role for sarcosine in  
561 prostate cancer progression. *Nature* **457**, 910–914 (2009).
- 562 39. Hai, Y., Huang, A. M. & Tang, Y. Structure-guided function discovery of an  
563 NRPS-like glycine betaine reductase for choline biosynthesis in fungi. *Proc. Natl. Acad.*  
564 *Sci.* **116**, 10348–10353 (2019).
- 565 40. Tikkanen, E., Gustafsson, S. & Ingelsson, E. Associations of Fitness, Physical  
566 Activity, Strength, and Genetic Risk With Cardiovascular Disease: Longitudinal  
567 Analyses in the UK Biobank Study. *Circulation* **137**, 2583–2591 (2018).
- 568 41. Kuo, C.-F., Grainge, M. J., Zhang, W. & Doherty, M. Global epidemiology of  
569 gout: prevalence, incidence and risk factors. *Nat. Rev. Rheumatol.* **11**, 649–662 (2015).
- 570 42. Chen, L. *et al.* Trans-provincial health impacts of atmospheric mercury emissions  
571 in China. *Nat. Commun.* **10**, 1484 (2019).
- 572 43. Freeman, J. D., Warren, R. L., Webb, J. R., Nelson, B. H. & Holt, R. A. Profiling  
573 the T-cell receptor beta-chain repertoire by massively parallel sequencing. *Genome Res.*  
574 **19**, 1817–1824 (2009).
- 575 44. Ahmadzadeh, M. *et al.* Tumor-infiltrating human CD4 + regulatory T cells  
576 display a distinct TCR repertoire and exhibit tumor and neoantigen reactivity. *Sci.*  
577 *Immunol.* **4**, eaao4310 (2019).
- 578 45. Wang, L. *et al.* Connecting blood and intratumoral Treg cell activity in predicting  
579 future relapse in breast cancer. *Nat. Immunol.* (2019) doi:10.1038/s41590-019-0429-7.
- 580 46. Zhang, C. *et al.* Impact of a 3-Months Vegetarian Diet on the Gut Microbiota and  
581 Immune Repertoire. *Front. Immunol.* **9**, (2018).
- 582 47. Davenport, E. R. *et al.* ABO antigen and secretor statuses are not associated with  
583 gut microbiota composition in 1,500 twins. *BMC Genomics* **17**, 941 (2016).
- 584 48. Zeevi, D. *et al.* Structural variation in the gut microbiome associates with host  
585 health. *Nature* (2019) doi:10.1038/s41586-019-1065-y.
- 586 49. Png, C. W. *et al.* Mucolytic bacteria with increased prevalence in IBD mucosa  
587 augment in vitro utilization of mucin by other bacteria. *Am. J. Gastroenterol.* **105**, 2420–  
588 8 (2010).
- 589 50. Marchandin, H. *et al.* Phylogenetic analysis of some Sporomusa sub-branch  
590 members isolated from human clinical specimens: description of *Megasphaera*  
591 *micronuciformis* sp. nov. *Int. J. Syst. Evol. Microbiol.* **53**, 547–53 (2003).
- 592 51. Wang, J. *et al.* Genome-wide association analysis identifies variation in vitamin D  
593 receptor and other host factors influencing the gut microbiota. *Nat. Genet.* **48**, 1396–1406  
594 (2016).
- 595 52. Bonder, M. J. *et al.* The effect of host genetics on the gut microbiome. *Nat. Genet.*  
596 **48**, 1407–1412 (2016).

- 597 53. Turpin, W. *et al.* Association of host genome with intestinal microbial  
598 composition in a large healthy cohort. *Nat. Genet.* (2016) doi:10.1038/ng.3693.
- 599 54. Liu, X. *et al.* M-GWAS for the Gut Microbiome in Chinese Adults Illuminates on  
600 Complex Diseases. *Cell* (2019) doi:10.2139/ssrn3383800.
- 601 55. Rausch, P. *et al.* Colonic mucosa-associated microbiota is influenced by an  
602 interaction of Crohn disease and FUT2 (Secretor) genotype. *Proc. Natl. Acad. Sci.* **108**,  
603 19030–19035 (2011).
- 604 56. Rausch, P. *et al.* Multigenerational Influences of the Fut2 Gene on the Dynamics  
605 of the Gut Microbiota in Mice. *Front. Microbiol.* **8**, 991 (2017).
- 606 57. Zhernakova, D. V. *et al.* Individual variations in cardiovascular-disease-related  
607 protein levels are driven by genetics and gut microbiome. *Nat. Genet.* (2018)  
608 doi:10.1038/s41588-018-0224-7.
- 609 58. Liu, Q. P. *et al.* Bacterial glycosidases for the production of universal red blood  
610 cells. *Nat. Biotechnol.* **25**, 454–464 (2007).
- 611 59. Rahfeld, P. *et al.* An enzymatic pathway in the human gut microbiome that  
612 converts A to universal O type blood. *Nat. Microbiol.* (2019) doi:10.1038/s41564-019-  
613 0469-7.
- 614 60. Sinha, T. *et al.* Analysis of 1135 gut metagenomes identifies sex-specific  
615 resistome profiles. *Gut Microbes* 1–9 (2018) doi:10.1080/19490976.2018.1528822.
- 616 61. Schnorr, S. L. *et al.* Gut microbiome of the Hadza hunter-gatherers. *Nat. Commun.*  
617 **5**, 3654 (2014).
- 618 62. Schloissnig, S. *et al.* Genomic variation landscape of the human gut microbiome.  
619 *Nature* **493**, 45–50 (2012).
- 620 63. Schüssler-Fiorenza Rose, S. M. *et al.* A longitudinal big data approach for  
621 precision health. *Nat. Med.* **25**, 792–804 (2019).
- 622 64. Zhou, W. *et al.* Longitudinal multi-omics of host–microbe dynamics in  
623 prediabetes. *Nature* **569**, 663–671 (2019).
- 624 65. Dankers, A. C. A. *et al.* Hyperuricemia influences tryptophan metabolism via  
625 inhibition of multidrug resistance protein 4 (MRP4) and breast cancer resistance protein  
626 (BCRP). *Biochim. Biophys. Acta* **1832**, 1715–22 (2013).
- 627 66. Song, Y. *et al.* *Alistipes onderdonkii* sp. nov. and *Alistipes shahii* sp. nov., of  
628 human origin. *Int. J. Syst. Evol. Microbiol.* **56**, 1985–90 (2006).
- 629 67. Cervenka, I., Agudelo, L. Z. & Ruas, J. L. Kynurenines: Tryptophan’s metabolites  
630 in exercise, inflammation, and mental health. *Science* **357**, eaaf9794 (2017).
- 631 68. So, A. K. & Martinon, F. Inflammation in gout: mechanisms and therapeutic  
632 targets. *Nat. Rev. Rheumatol.* (2017) doi:10.1038/nrrheum.2017.155.
- 633 69. Parvez, F. *et al.* Assessment of arsenic and polycyclic aromatic hydrocarbon  
634 (PAH) exposures on immune function among males in Bangladesh. *PloS One* **14**,  
635 e0216662 (2019).
- 636 70. Criñan, T. O. *et al.* Soluble uric acid primes TLR-induced proinflammatory  
637 cytokine production by human primary cells via inhibition of IL-1Ra. *Ann. Rheum. Dis.*  
638 **75**, 755–62 (2016).
- 639 71. Thomas, A. M. *et al.* Metagenomic analysis of colorectal cancer datasets  
640 identifies cross-cohort microbial diagnostic signatures and a link with choline  
641 degradation. *Nat. Med.* **25**, 667–678 (2019).

- 642 72. Manna, S. K. *et al.* Biomarkers of Coordinate Metabolic Reprogramming in  
643 Colorectal Tumors in Mice and Humans. *Gastroenterology* **146**, 1313–1324 (2014).
- 644 73. Qiu, Y. *et al.* Serum metabolite profiling of human colorectal cancer using GC-  
645 TOFMS and UPLC-QTOFMS. *J Proteome Res* **8**, 4844–4850 (2009).
- 646 74. Yachida, S. *et al.* Metagenomic and metabolomic analyses reveal distinct stage-  
647 specific phenotypes of the gut microbiota in colorectal cancer. *Nat. Med.* (2019)  
648 doi:10.1038/s41591-019-0458-7.
- 649 75. Jie, Z. *et al.* The vagino-cervical microbiome as a woman’s life history. *Revis.*  
650 *Cell* (2019) doi:10.1101/533588.
- 651 76. van Kessel, S. P. *et al.* Gut bacterial tyrosine decarboxylases restrict levels of  
652 levodopa in the treatment of Parkinson’s disease. *Nat. Commun.* **10**, 310 (2019).
- 653 77. Maini Rekdal, V., Bess, E. N., Bisanz, J. E., Turnbaugh, P. J. & Balskus, E. P.  
654 Discovery and inhibition of an interspecies gut bacterial pathway for Levodopa  
655 metabolism. *Science* **364**, eaau6323 (2019).
- 656 78. McAlpine, C. S. *et al.* Sleep modulates haematopoiesis and protects against  
657 atherosclerosis. *Nature* (2019) doi:10.1038/s41586-019-0948-2.
- 658 79. Lane, J. M. *et al.* Genome-wide association analyses of sleep disturbance traits  
659 identify new loci and highlight shared genetics with neuropsychiatric and metabolic traits.  
660 *Nat. Genet.* **49**, 274–281 (2016).
- 661 80. Cappuccio, F. P. *et al.* Meta-analysis of short sleep duration and obesity in  
662 children and adults. *Sleep* **31**, 619–26 (2008).
- 663 81. Cedernaes, J. *et al.* Acute sleep loss results in tissue-specific alterations in  
664 genome-wide DNA methylation state and metabolic fuel utilization in humans. *Sci. Adv.*  
665 **4**, eaar8590 (2018).
- 666 82. Barton, W. *et al.* The microbiome of professional athletes differs from that of  
667 more sedentary subjects in composition and particularly at the functional metabolic level.  
668 *Gut* gutjnl-2016-313627 (2017) doi:10.1136/gutjnl-2016-313627.
- 669 83. Price, N. D. *et al.* A wellness study of 108 individuals using personal, dense,  
670 dynamic data clouds. *Nat. Biotechnol.* **35**, 747–756 (2017).
- 671 84. Jensen, C. S. *et al.* Exercise as a potential modulator of inflammation in patients  
672 with Alzheimer’s disease measured in cerebrospinal fluid and plasma. *Exp. Gerontol.* **121**,  
673 91–98 (2019).
- 674 85. da Silva, D. E. *et al.* High-Intensity Interval Training in Patients with Type 2  
675 Diabetes Mellitus: a Systematic Review. *Curr. Atheroscler. Rep.* **21**, 8 (2019).
- 676 86. Popovic, B. *et al.* Acute Response to Endurance Exercise Stress: Focus on  
677 Catabolic/anabolic Interplay Between Cortisol, Testosterone, and Sex Hormone Binding  
678 Globulin in Professional Athletes. *J. Med. Biochem.* **38**, 6–12 (2019).
- 679 87. Maldonado-Gómez, M. X. *et al.* Stable Engraftment of *Bifidobacterium longum*  
680 AH1206 in the Human Gut Depends on Individualized Features of the Resident  
681 Microbiome. *Cell Host Microbe* **20**, 515–526 (2016).
- 682 88. Pan, H. *et al.* A gene catalogue of the Sprague-Dawley rat gut metagenome.  
683 *GigaScience* **7**, (2018).
- 684 89. Pan, H. *et al.* A single bacterium resurrects the microbiome-immune balance to  
685 protect bones from destruction in a rat model of rheumatoid arthritis. *Microbiome* **7**, 107  
686 (2019).

- 687 90. Yatsunenکو, T. *et al.* Human gut microbiome viewed across age and geography.  
688 *Nature* **486**, 222–7 (2012).
- 689 91. Valenzuela, J. A., Flórez, A. B., Vázquez, L., Vasek, O. M. & Mayo, B.  
690 Production of  $\gamma$ -aminobutyric acid (GABA) by lactic acid bacteria strains isolated from  
691 traditional, starter-free dairy products made of raw milk. *Benef. Microbes* **10**, 579–587  
692 (2019).
- 693 92. Daisley, B. A. *et al.* Immobilization of cadmium and lead by *Lactobacillus*  
694 *rhamnosus* GR-1 mitigates apical-to-basolateral heavy metal translocation in a Caco-2  
695 model of the intestinal epithelium. *Gut Microbes* 1–13 (2018)  
696 doi:10.1080/19490976.2018.1526581.
- 697 93. Han, M. *et al.* A novel affordable reagent for room temperature storage and  
698 transport of fecal samples for metagenomic analyses. *Microbiome* **6**, 43 (2018).
- 699 94. Fang, C. *et al.* Assessment of the cPAS-based BGISEQ-500 platform for  
700 metagenomic sequencing. *GigaScience* **7**, 1–8 (2018).
- 701 95. Zhang, W. *et al.* IMonitor: A Robust Pipeline for TCR and BCR Repertoire  
702 Analysis. *Genetics* **201**, 459–472 (2015).
- 703 96. Marbach, D. *et al.* Wisdom of crowds for robust gene network inference. *Nat.*  
704 *Methods* **9**, 796–804 (2012).
- 705 97. Louppe, G., Wehenkel, L., Suter, A. & Geurts, P. Understanding variable  
706 importances in forests of randomized trees. in *Advances in Neural Information*  
707 *Processing Systems 26* (eds. Burges, C. J. C., Bottou, L., Welling, M., Ghahramani, Z. &  
708 Weinberger, K. Q.) 431–439 (Curran Associates, Inc., 2013).
- 709 98. Morgan, X. C. *et al.* Dysfunction of the intestinal microbiome in inflammatory  
710 bowel disease and treatment. *Genome Biol.* **13**, R79 (2012).

711

712

713

714

715

716

717

718

719

720

721

722

723

724

725 **Online Methods :**

726 **Study Cohort**

727 As part of 4D-SZ, all the >2000 volunteers for the first cohort were recruited  
728 between May 2017 and July 2017 during a physical examination. The 1400 volunteers for  
729 the second cohort were also recruited in 2017, with no overlaps. The samples in each  
730 omics are shown in Supplementary Table 1c. Baseline characteristics of the cohort are  
731 shown in Supplementary Table 1b, 1d.

732 The study was approved by the Institutional Review Boards (IRB) at BGI-Shenzhen,  
733 and all participants provided written informed consent at enrolment.

734

735 **Demographic Data Collection**

736 The lifestyle questionnaire contained 56 entries involving age, marital status, disease  
737 history of the volunteer and his/her family, eating and exercise habits (Supplementary  
738 Table 1b, 1d). The psychological questionnaire contained 18 entries for the evaluation of  
739 irritability, dizziness, frustration, fear, appetite, self-confidence, resilience  
740 (Supplementary Table 1b).

741

## 742 **Samples Collection**

743 Fecal samples were self-collected by volunteers, using a kit containing a room  
744 temperature stabilizing reagent to preserve the metagenome<sup>93</sup>. The samples were frozen  
745 on the same day. The overnight fasting blood samples were drawn from a cubital vein of  
746 volunteers by the doctors.

747

## 748 **DNA extraction and metagenomics shotgun sequencing**

749 DNA extraction of the stored fecal samples within the next few months was  
750 performed as previously described (Qin et al., 2012). Metagenomic sequencing was done  
751 on the BGISEQ-500 platform (100bp of singled-end reads for fecal samples and four  
752 libraries were constructed for each lane)<sup>94</sup>.

753

## 754 **Amino Acid Measurements**

755 40  $\mu$ l plasma was deproteinized with 20  $\mu$ l 10% (w/v) sulfosalicylic acid (Sigma)  
756 containing internal standards, then 120  $\mu$ l aqueous solution was added. After centrifuged,  
757 the supernatant was used for analysis. The analysis was performed by ultra high pressure  
758 liquid chromatography (UHPLC) coupled to an AB Sciex Qtrap 5500 mass spectrometry  
759 (AB Sciex, US) with the electrospray ionization (ESI) source in positive ion mode. A  
760 Waters ACQUITY UPLC HSS T3 column (1.8  $\mu$ m, 2.1  $\times$  100 mm) was used for amino  
761 compound separation with a flow rate at 0.5 ml/min and column temperature of 55 °C.  
762 The mobile phases were (A) water containing 0.05% and 0.1% formic acid (v/v), (B)  
763 acetonitrile containing 0.05% and 0.1% formic acid (v/v). The gradient elution was 2% B  
764 kept for 0.5 min, then changed linearly to 10% B during 1 min, continued up to 35% B in

765 2 min, increased to 95% B in 0.1 min and maintained for 1.4 min. Multiple Reaction  
766 Monitoring (MRM) was used to monitor all amino compounds. The mass parameters  
767 were as follows, Curtain gas flow 35 L/min, Collision Gas (CAD) was medium, Ion  
768 Source Gas 1 (GS 1) flow 60 l/min, Ion Source Gas 2 (GS 2) flow 60 l/min, IonSpray  
769 Voltage (IS) 5500V, temperature 600 °C. All amino compound standards were purchased  
770 from sigma and Toronto research chemical (TRC).

771

## 772 **Hormone Measurements**

773 250 µl plasma was diluted with 205 µl aqueous solution, For SPE experiments, HLB  
774 (Waters, USA) was activated with 1.0 ml of dichloromethane, acetonitrile, methanol,  
775 respectively and was equilibrated with 1.0 ml of water. The pretreated plasma sample was  
776 loaded onto the cartridge and was extracted using gravity. Clean up was accomplished by  
777 washing the cartridges with 1.0 ml of 25% methanol in water. After drying under  
778 vacuum, samples on the cartridges were eluted with 1.0 ml of dichloromethane. The  
779 eluted extract was dried under nitrogen and the residual was dissolved with 25%  
780 methanol in water and was transferred to an autosampler vial prior to LC–MS/MS  
781 analysis. The analysis was performed by UHPLC coupled to an AB Sciex Qtrap 5500  
782 mass spectrometry (AB Sciex, US) with the atmospheric pressure chemical ionization  
783 (APCI) source in positive ion mode. A Phenomene Kinetex C18 column (2.6 µm, 2.1 ×  
784 50 mm) was used for steroid hormone separation with a flow rate at 0.8 ml/min and  
785 column temperature of 55 °C. The mobile phases were (A) water containing 1mM  
786 Ammonium acetate, (B) Methanol containing 1mM Ammonium acetate. The gradient  
787 elution was 25% B kept for 0.9min, then changed linearly to 40% B during 0.9min,

788 continued up to 70% B in 2 min, increased to 95% B in 0.1 min and maintained for 1.6  
789 min. Multiple Reaction Monitoring (MRM) was used to monitor all steroid hormone  
790 compounds. The mass parameters were as follows, Curtain gas flow 35 l/min, Collision  
791 Gas (CAD) was medium, Ion Source Gas 1 (GS 1) flow 60 l/min, Ion Source Gas 2 (GS  
792 2) flow 60 l/min, Nebulizer Current (NC) 5, temperature 500 °C. All steroid hormone  
793 profiling compound standards were purchased from sigma, Toronto research chemical  
794 (TRC), Cerilliant and DR. Ehrenstorfer.

795

#### 796 **Trace element Measurements**

797 200 µl of whole blood were transferred into a 15 mL polyethylene tube and diluted  
798 1:25 with a diluent solution consisting of 0.1% (v/v) Triton X-100, 0.1% (v/v)  
799 HNO<sub>3</sub>, 2mg/L AU, and internal standards (20 µg/L). The mixture was sonicated for  
800 10min before ICP-MS analysis. Multi-element determination was performed on an  
801 Agilent 7700x ICP-MS (Agilent Technologies, Tokyo, Japan) equipped with an octupole  
802 reaction system (ORS) collision/reaction cell technology to minimize spectral  
803 interferences. The continuous sample introduction system consisted of an autosampler, a  
804 quartz torch with a 2.5-mm diameter injector with a Shield Torch system, a Scott double-  
805 pass spray chamber and nickel cones (Agilent Technologies, Tokyo, Japan). A glass  
806 concentric MicroMist nebuliser (Agilent Technologies, Tokyo, Japan) was used for the  
807 analysis of diluted samples.

808

#### 809 **Water-soluble Vitamins Measurements**



810 200 µl plasma were deproteinized with 600 µl methanol (Merck), water, acetic acid  
811 (9:1:0.1) containing internal standards, thiamine-(4-methyl-13C-thiazol-5-yl-13C3)  
812 hydrochloride (Sigma-Aldrich), levomefolic acid-13C, d3, riboflavin-13C,15N2, 4-  
813 pyridoxic acid-d3 and pantothenic acid-13C3,15N hemi calcium salt (Toronto Research  
814 Chemicals). 500 µl supernatant were dried by nitrogen flow. 60 µl water were added to  
815 the residues, vortexed, the mixture was centrifuged and the supernatant was for analysis.  
816 The analysis was performed by UPLC coupled to a Waters Xevo TQ-S Triple Quad mass  
817 spectrometry (Waters, USA) with the electrospray ionization (ESI) source in positive ion  
818 mode. A Waters ACQUITY UPLC HSS T3 column (1.7 µm, 2.1 × 50 mm) was used for  
819 water-soluble vitamins separation with a flow rate at 0.45 ml/min and column  
820 temperature of 45 °C. The mobile phases were (A) 0.1 % formic acid in water, (B) 0.1%  
821 formic acid in methanol. The following elution gradient was used: 0–1 min,99.0%–99.0%  
822 A; 1–1.5 min, 99.0% A–97.0% A; 1.5–2 min, 97.0% A–70.0% A,2–3.5 min, 70% A–  
823 30% A; 3.5–4.0 min, 30%A–10.0%A; 4.0–4.8 min, 10%A–10.0%A; 4.9–6.0 min,  
824 99.0%A–99.0%A. Multiple Reaction Monitoring (MRM) was used to monitor all water-  
825 soluble vitamins. The mass parameters were as follows, the capillary voltages of 3000V  
826 and source temperature of 150°C were adopted. The desolvation temperature was 500°C.  
827 The collision gas flow was set at 0.10 ml/min. The cone gas and desolvation gas flow  
828 were 150 l/h and 1000 l/h, respectively. All water-soluble vitamins standards were  
829 purchased from Sigma-Aldrich (USA).

830

831 **Fat-soluble Vitamins Measurements**

832 250 µl plasma were deproteinized with 1000 µl methanol and acetonitrile, (v/v,1:1)  
833 (Fisher Chemical) containing internal standards, all-trans-Retinol-d5, 25-  
834 HydroxyVitamin-D2-d6, 25-HydroxyVitamin-D3-d6, vitamin K1-d7, α-Tocopherol-d6  
835 (Toronto Research Chemicals). 900 µl supernatant were dried by nitrogen flow. 80 µl  
836 80% acetonitrile were added to the residues, vortexed, the mixture was centrifuged, and  
837 the supernatant was used for analysis. The analysis was performed by UPLC coupled to  
838 an AB Sciex Qtrap 4500 mass spectrometry (AB Sciex, USA) with the atmospheric  
839 pressure chemical ionization (APCI) source in positive ion mode. A Waters ACQUITY  
840 UPLC BEH C18 column (1.7 µm, 2.1 × 50 mm) was used for fat-soluble vitamins  
841 separation with a flow rate at 0.50 ml/min and column temperature of 45 °C. The mobile  
842 phases were (A) 0.1 % formic acid in water, (B) 0.1% formic acid in acetonitrile. The  
843 following elution gradient was used: 0–0.5 min,60.0%–60.0% A; 0.5–1.5 min, 60.0% A–  
844 20.0% A; 1.5–2.5 min, 20.0% A–0% A,2.5–4.5 min, 0% A–0% A; 4.5–4.6 min, 0%A–  
845 60.0%A; 4.6–5.0 min, 60.0%A–60.0%A. Multiple Reaction Monitoring (MRM) was  
846 used to monitor all fat-soluble vitamins. The mass parameters were as follows, Curtain  
847 gas flow 30 l/min, Collision Gas (CAD) was medium, Ion Source Gas 1 (GS 1) flow 40  
848 l/min, Ion Source Gas 2 (GS 2) flow 50 l/min, Nebulizer Current (NC) 5, temperature 400  
849 °C. All fat-soluble vitamins standards were purchased from Sigma-Aldrich (USA),  
850 Toronto research chemical (TRC).

851

## 852 **Immune indices Measurements**

853 10 ml whole blood was centrifuged at 3,000 r/min for 10 min, then 165 µl buffy coat  
854 were obtained to extract DNA using MagPure Buffy Coat DNA Midi KF Kit (Magen,

855 China). The DNA was sequenced on the BGISEQ- 500 platform using 200 bp singled-  
856 end reads. The data processing was performed using Immune IMonitor<sup>95</sup>. VJ Gene use  
857 diversity is shannon index of VJ gene usage profile. Immune cell diversity is Shannon  
858 index of CDR3. Immune cell species result is unique CDR3 number. Immunity  
859 uniformity is CDR3 pielou index. Score of above index is the sample rank in population.

860

### 861 **Medical Parameters**

862 All the volunteers were recruited during the physical examination. The medical test  
863 including blood tests, urinalysis, routine examination of cervical secretion. All the  
864 medical parameters were measured by the physical examination center and shown in  
865 Supplementary Table 1b, 1d.

866

### 867 **Facial Skin feature**

868 The volunteer's frontal face without makeup was photographed by VISIA-CRTM  
869 imaging system (Canfield Scientific, Fairfield, NJ, USA) equipped with chin supports  
870 and forehead clamps that fix the face during the photographing process and maintain a  
871 fixed distance between the volunteers and the camera at all times. Eight indices were  
872 obtained including spots, pores, wrinkles, texture, UV spots, porphyrins, brown spots and  
873 red area from the cheek and forehead, respectively (Supplementary Table 1b). The  
874 percentile of index was calculated based on the index value ranked in the age-matched  
875 database, the higher the better (Supplementary Table 1b).

876

### 877 **Physical fitness test**

878 8 kinds of tests were performed to evaluate volunteers' physical fitness condition  
879 (Supplementary Table 1b). Vital capacity was measured by HK6800-FH (Hengkangjiaye,  
880 China). Eye-closed and single-legged standing was measured by HK6800-ZL. Choice  
881 reaction time was measured by HK6800-FY. Grip strength was measured by HK6800-  
882 WL. Sit and reach was measured by HK6800-TQ. Sit-ups was measured by HK6800-YW.  
883 Step index was measured by HK6800-TJ. Vertical jump was measured by HK6800-ZT.  
884 We got a measure value from each test. Then each measure value score was assigned 1  
885 through 5 based on its corresponding age-matched national standards (Supplementary  
886 Table 4). Both the direct measurements and the scores were used for analyses  
887 (Supplementary Table 2, Supplementary Table 3).

888

### 889 **Quality control, taxonomic annotation and abundance calculation**

890 The sequencing reads were quality-controlled as described previously<sup>94</sup>. Taxonomic  
891 assignment of the high-quality fecal metagenomic data was performed using the reference  
892 gene catalog comprising 9,879,896 gene<sup>12</sup>. Taxonomy of the fecal MGSs/MLGs were  
893 then determined from their constituent genes, as previously described<sup>1,13,14,35</sup>.

894

### 895 **The factors in each type of omics predicted by other type omics**

896 The factors in each type of omics were regressed against the relative abundances of  
897 mgs profile (found in at least 10% of the samples) in the fecal samples using default  
898 parameters in the RFCV function from randomForest package in R. Dichotomous  
899 variables (such as gender ) and unordered categorical variable (such as region) were re-  
900 coding into dummy variables. Frequency items such as yogurt eating habit were assigned

901 integers. RFCV R defined as spearman's correlation between measured value and 5-fold  
902 cross-validation predicted value was calculated, and then rank the top 5 predictable  
903 factors in each omics type. The same prediction process was done between any two types  
904 of omics. Then ggplot2 package in R was used to boxplot predict power of target omics  
905 factors by all kinds of other predictor omics (Fig. 2b). 75% quantile RFCV R between  
906 any two types omics (from a to b and from b to a) was used to construct the bi-direction  
907 global omics correlation network using CytoScape (Fig. 2a). R heatmap and barplot was  
908 used to make heatmap plot for some representative factors (Fig. 2c, Supplementary Fig.  
909 1).

910

### 911 **Adjusting for potential confounders**

912 Associations between gut microbiome MGSs, functional modules, Shannon  
913 diversity, and variance explained and other omics data were all adjusted for factors that  
914 probably influence the gut microbiome, including gender, age, BMI, health products  
915 (amino acid, vitamin, calcium), antiviral, antibiotics, drugs (currently using  
916 antihypertensive drugs, hyperglycemic drugs, lipid lowering drugs), days since last  
917 menstrual bleeding, pregnant, lactation, bowel problem (defecation). Besides the above  
918 basic set of confounders, we also show the results adjusting for more potential  
919 confounders including dietary (dietary taste spicy, sweet, salty, oil, or light, high sugar  
920 and high-fat diet habit, fruit and vegetable intake, favors fat meat), exercise (exercise  
921 frequency, exercise intensity, average time per exercise), drinking, smoking and Bristol's  
922 stool score.

923

924 **Benjamini-Hochberg multiple hypothesis testing correction**

925 The multiple hypothesis testing Benjamini-Hochberg corrections are done for one  
926 source target omics pair each time for Fig. 4-6, except immune index and gut microbe  
927 pair which BH-adjust was done on one immune index each time. We show two versions  
928 of Benjamini-Hochberg correction for Shannon and other omics in Supplementary Table  
929 2a. One of the BH adjust was done within one omics each time. Another adjust was done  
930 overall on all omics.

931

932 **Robust association network construction between any two omics data type including**  
933 **fecal microbial MGSs**

934 An rank average method<sup>96</sup> was used to combine the results of multiple inference  
935 methods to make a robust omics association network. We combined two non-linear  
936 models, one-to-many randomforest and one-to-one partial spearman's correlation, to test  
937 the association between factor from any two types omics.

938 *Step 1: Data preprocessing.*

939 Dichotomous variables (such as gender) and unordered categorical variable (such as  
940 region) were re-coding into dummy variables. Frequency items such as yogurt eating  
941 habit were assigned integers. We removed variables following these rules: (i) The  
942 microbial species less than 10% in all the samples. (ii) Near zero variance. (iii) With  
943 more than 70% missing value. Missing values were filled with median. Outliers were  
944 defined as outside of the 95% quartiles and outliers samples are removed.

945 *Step 2: Computation of associations using multiple inference methods.*

946 For each factor in one omics, we did regression using RFCV function with default  
947 parameter based on all factors in one other omics and calculated RFCV R.<sup>97</sup> 5-fold  
948 average variable importance was output for step3. Partial spearman's correlation (ppcor R  
949 package) between factors from any two types of omics were also output. Potential  
950 confounders were considered as described above. We also show generalized linear model  
951 results from MaAslin R package<sup>98</sup>) with default parameters after adjusting above  
952 confounders.

953 *Step 3: Robust networks construction.*

954 To get the robust and strongest association between factors from any two type omics,  
955 in other words, to filter predictor factors and target factors, we did it in two steps. First to  
956 choose the target factors, we just kept the top 20 target factors with highest RFCV R.  
957 Then to choose predictor factors for every selected target factor, we kept predictor factors  
958 with top 30 average ranks and retained edges with partial spearman's correlation BH-  
959 adjusted pvalue <0.05. The average rank was computed as sum of the ranks across the  
960 RFCV importance and absolute partial spearman rho. For example, metabolites as target  
961 and gut microbe as source. We regressed gut microbes against the metabolites and  
962 compute the 5-fold cross validation predict power (RFCV R) for each metabolites and  
963 partial spearman correlation. 20 metabolites with highest RFCV were kept. For each of  
964 the 20 select metabolites such as VA, average ranks across RFCV and partial spearman  
965 were done. Gut microbe biomarker for VA was found with average rank top 30<sup>th</sup> and  
966 passed the partial spearman BH-adjusted pvalue <0.05.

967 *Step 4: Network visualization.*

968 For each target factor, top 5-10 average ranks source factor in each source omics  
969 type were selected as representative factors to make barplots using ggplot2 package (Fig.  
970 6). The pheatmap package was used to plot the common representative factors that could  
971 be strongest predicted by multiple omics data type (Fig. 2c). All the source-target factors  
972 pair RFCVR (a as source, b as target and b as source, a as target) was boxplot (Fig. 2b)  
973 using ggplot2. The ComplexHeatmap package in R was used to plot omics triadic relation  
974 (Fig. 4-6). CytoScape was also used to visualize the global omics network (Fig. 2a).

975

#### 976 **Microbial metabolic syndrome risk index validation in cardiometabolic cohort.**

977 Using multi-omics analyses method described above after controlling for the  
978 potential confounders above, we picked up 80 MGSs that significantly correlated with  
979 one of the eight cardiometabolic risk factors (waist Hip Ratio, BMI, triglyceride  
980 (mmol/L), High-Density-Lipoprotein (mmol/L), serum Uric Acid ( $\mu$  mol/L),  $\gamma$ -glutamyl  
981 transpeptidase (U/L), serum alanine aminotransferase(U/L), fasting blood glucose  
982 (mmol/L) ) (Supplementary Fig. 5, 6). And they are link to the BCAA metabolites (valine  
983 / leucine / alanine), tryptophan, glutamic acid ( $q < 0.1$ , Supplementary Table 3a). For the  
984 published disease studies from China, all the MGSs abundances were derived from  
985 metagenomic shotgun data, while the 8 clinical measurements could be missing, e.g. liver  
986 cirrhosis and Crohn's disease only had BMI available<sup>21,31,32,34,35</sup> (Supplementary Fig. 5,  
987 6). The microbial metabolic syndrome risk index is similar with the T2D index (Qin et al,  
988 2012). For each individual validation sample, the microbial metabolic syndrome risk  
989 index of sample  $j$  that denoted by  $MMSR_j$  was computed by the formula below:

$$PR_{ij} = \text{Count}(A_{ij} > R_i) / N$$



$$J^B = \sum_{i \in B} PR_{ij}$$

$$J^G = \sum_{i \in G} PR_{ij}$$

$$MMSR_j = \frac{J^B}{|B|} - \frac{J^G}{|G|}$$

990 Where  $A_{ij}$  is a scalar represents the relative abundance of MGS  $i$  in validation  
991 sample  $j$ .  $R_i$  is a vector represents the relative abundance of MGS  $i$  of all samples in this  
992 cohort which served as healthy reference.  $N$  is the sample size of this cohort that is 2183.  
993 Percentile rank  $PR_{ij}$  is the percentage of test sample  $j$ 's MGS  $i$  relative abundance in its  
994 reference cohort frequency distribution that are equal to or lower than it.  $B$  is 12 out of 80  
995 MGS that were positively correlated with BMI and Triglyceride.  $G$  is 68 out of 80 MGS  
996 that were negatively correlated with BMI and Triglyceride. And  $|B|$  and  $|G|$  are the sizes  
997 of these two sets. We used percentile rank instead of relative abundance to avoid that the  
998 index was influenced too much by the dominant species.

999

#### 1000 **Figure legends:**

1001 **Fig. 1 | Overview of the multi-omic cohorts.** Diagram for features available from the  
1002 main cohort of 2,183 individuals and validation cohort of 1,404 volunteers. Details are  
1003 available in Supplementary Table 1.

1004 **Fig. 2 | Overview of the interrelationship between omics in the main cohort. a,**  
1005 Global association strength between omics datasets. Each arrow is a 5-fold cross-  
1006 validation random forest (RFCV) prediction. The direction of the arrow indicated the

1007 direction of prediction, used the source omics dataset to predict the target dataset. The  
1008 darkness and size of the arrow lines indicated 75% quantile of spearman's correlation  
1009 between measured value and 5-fold cross-validation RFCV predicted value (RFCV R). **b**,  
1010 Detailed predict power of source omics for each target omics. Tick label in x-axis is  
1011 target omics. Title in top is source omics. Each node in box is a target factor. The color of  
1012 the node and box line indicated the target omics data type. Y-axis is the target factor  
1013 RFCV R predicted from source omics. **c**, Common representative factors that could be  
1014 strongest predicted by multiple omics data type. Y-axis tick label is source omics. Title is  
1015 target omics. X-axis tick label is common representative factors (target factors). The cell  
1016 color in heat map indicated the RFCV R using the omics data in y-axis to predict each  
1017 factor in x-axis.

1018 **Fig. 3 | Factors associated with gut microbiome in both cohorts.** Top 45 factors with  
1019 RFCV R > 0.1 in each type of omics that are predicted by gut microbiome. Factors with  
1020  $R \leq 0.1$  in main cohort are not shown. The length of the bar indicated the rank RFCV R  
1021 using all samples and the color indicated the rank of max of RFCV R using male or  
1022 female samples only, the darker the greater. Due to missing medical data in the validation  
1023 cohort (Fig. 1, Supplementary Table 1), only red blood cell count can be validated.

1024 **Fig. 4 | Association map of the four-tiered analyses integrating the metabolites,**  
1025 **clinical indices, life style and the fecal microbiome.** The color of heat map show the  
1026 partial spearman correlation adjusted for factors that probably influence the gut  
1027 microbiome, as shown in Supplementary Fig. 3. BH-adjusted p-value is denoted: +, q-  
1028 value < 0.1; \*, q-value < 0.05; \*\*, q-value < 0.01.

1029 **Fig. 5 | Gut microbiome associated with physical fitness and exercise in the main**

1030 **cohort.** The color of heat map shows the partial spearman correlation adjusted factors

1031 that probably influence the gut microbiome, as shown in Supplementary Fig. 3. BH

1032 adjusted p-value is denoted: +, q-value<0.1; \*, q-value<0.05; \*\*, q-value<0.01

1033 **Fig. 6 | Influence of yogurt and milk intake on omics in the main cohort. a-e,** The top

1034 5 factor in each omics data associated with yogurt, milk intake habit and the

1035 *Streptococcus thermophiles*, *Bifidobacterium animalis* and *Clostridium bolteae*

1036 abundance. The length of the bars represents partial Spearman's correlation coefficient

1037 adjusted for factors that probably influence the gut microbiome, as shown in

1038 Supplementary Fig. 3. BH adjusted p-value is denoted: +, q-value<0.1; \*, q-value<0.05;

1039 \*\*, q-value<0.01; \*\*\*, q-value<0.001; \*\*\*\*, q-value<0.0001. **f,** Fecal relative abundance

1040 of *S. thermophilus* in volunteers with increasing frequency of yogurt consumption.

## 49 facial skin imaging indices (only in the main cohort)

Spots, Pores, Wrinkles, Porphyrins, Texture, UV spots, Porphyrins, Brown spots and red area from the cheek and forehead, respectively.

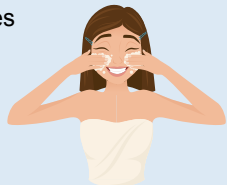

## Psychological questionnaire (18 entries)

The evaluation of irritability, Appetite, Dizziness, Frustration, Resilience, Fear, Self-confidence...

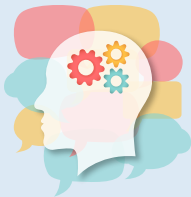

## Lifestyle questionnaire (56 entries)

Age, Gender, Marital status, BMI, Smoking, Drinking, Disease history, Eating habits, Exercise habits...

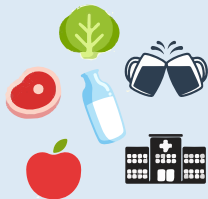

## Fecal microbiome

Shotgun metagenomics  
(1,507 MGSs and 2,981 MLGs)

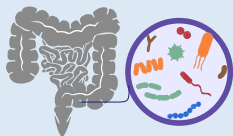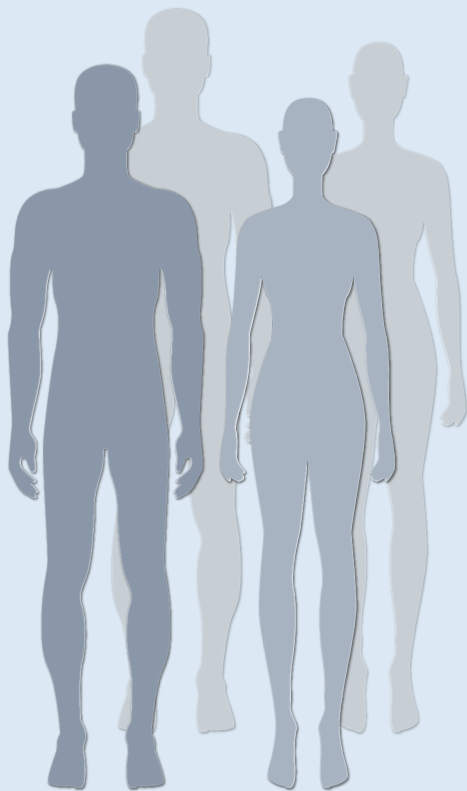

**3,587 Healthy adults**

The main cohort: 2,183 individuals

The validation cohort: 1,404 individuals

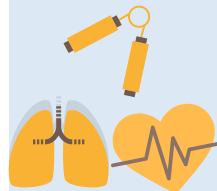

## 24 physical fitness data (only in the main cohort)

Vital capacity, Grip strength, Sit-ups, Choice reaction time, Sit and reach, One-leg stand with eyes closed, Step index, Vertical jump...

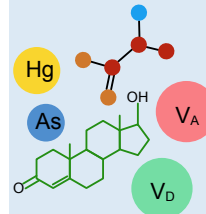

## 104 plasma metabolites

Amino acids (plasma)  
Hormones (plasma)  
Vitamins (plasma)  
Trace elements (whole blood)

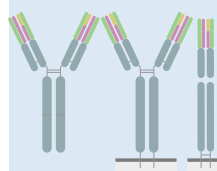

## 634 immune indices (buffy coat)

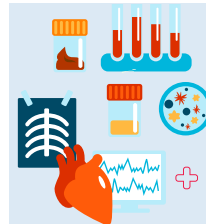

## 72 basic medical data (9 in validation cohort)

Body measurements:  
BMI, Chest circumference, Uric acid  
Routine blood test:  
Alkaline phosphatase, Bilirubin, HDL, LDL, Globulin, Creatinine (serum)

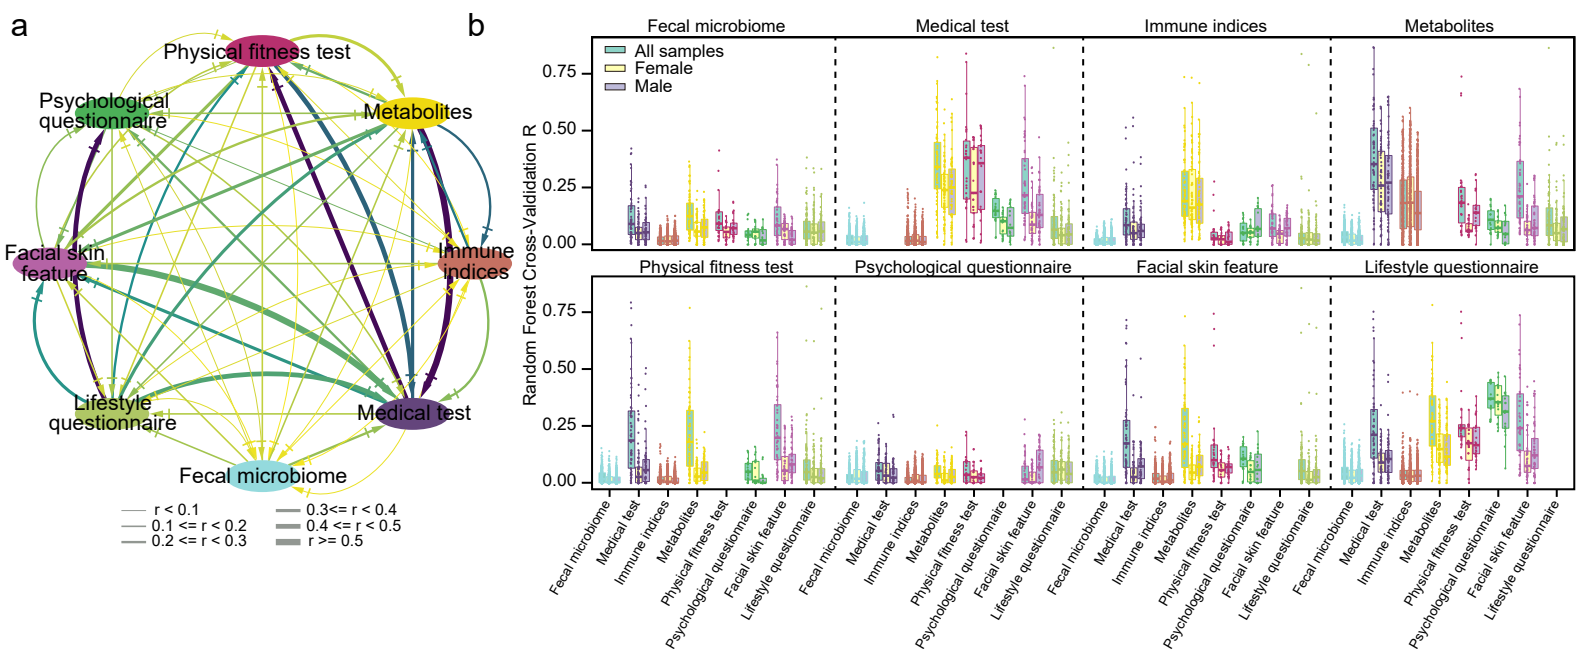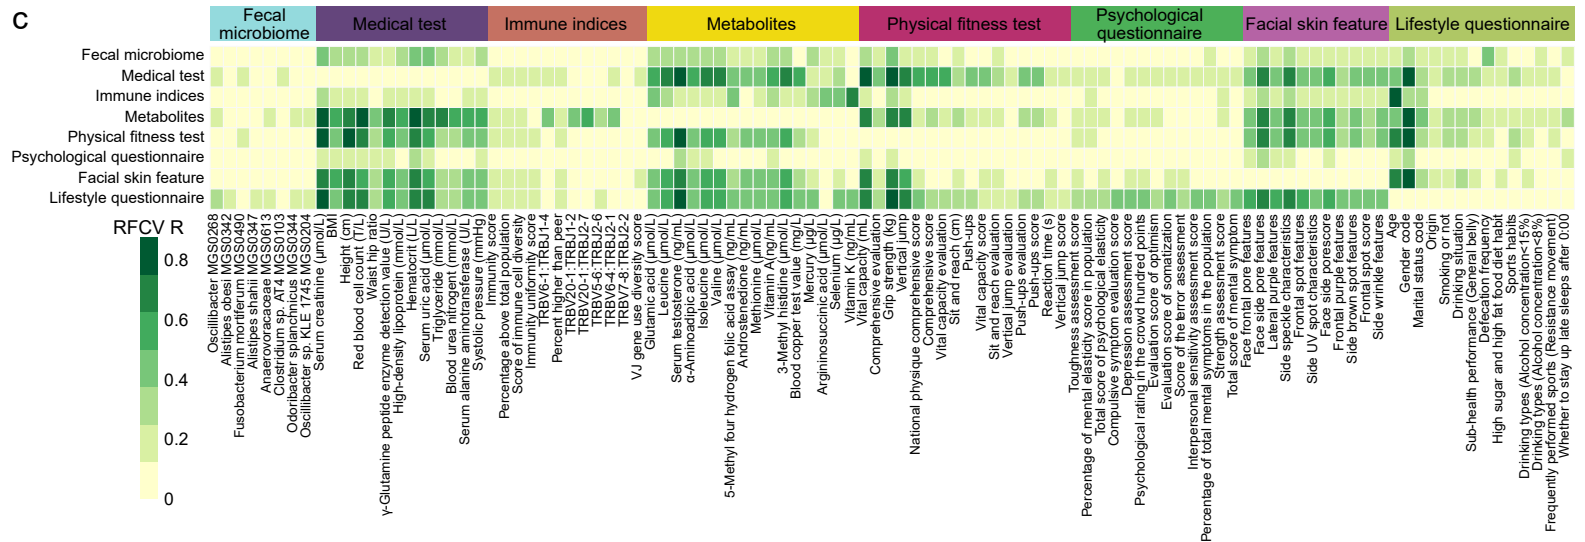

### Lifestyle questionnaire

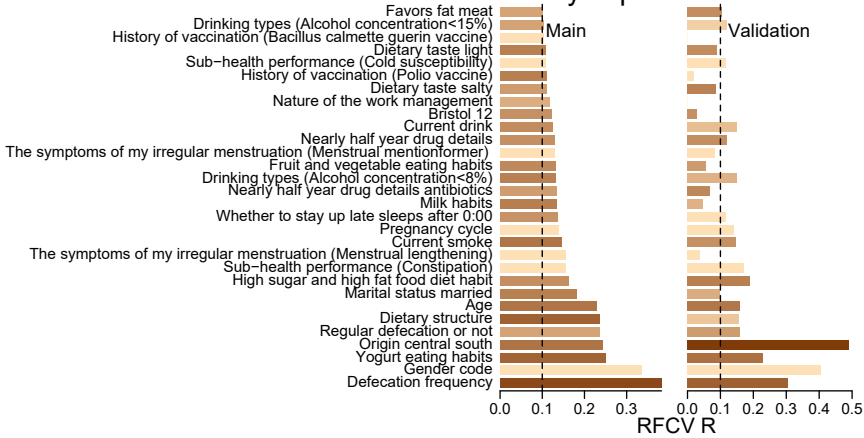

### Metabolites

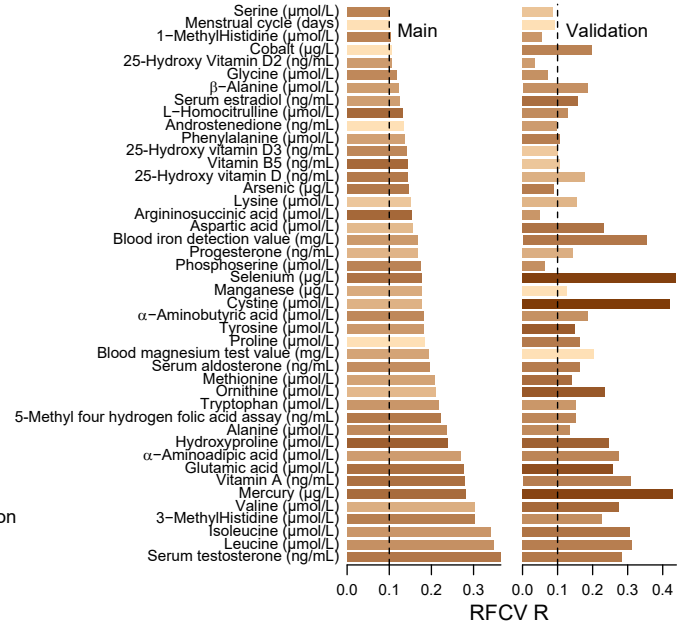

### Medical test

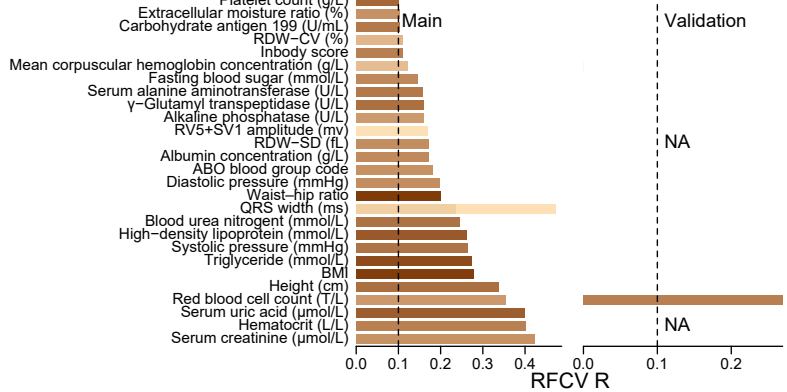

### Immune indices

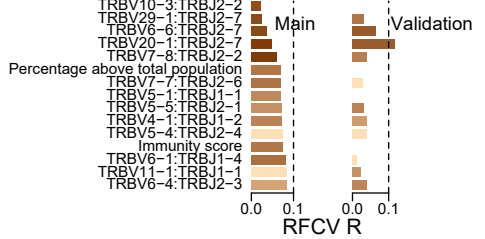

### Physical fitness test

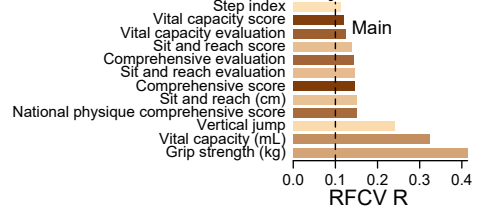

### Psychological questionnaire

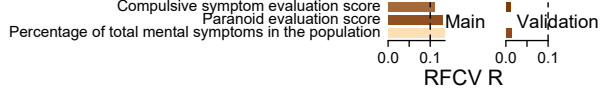

### Facial skin feature

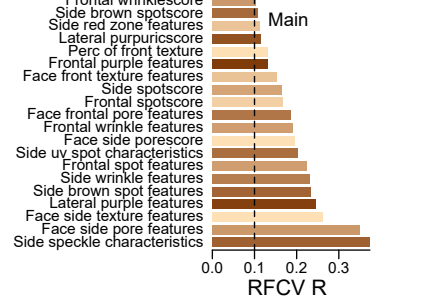

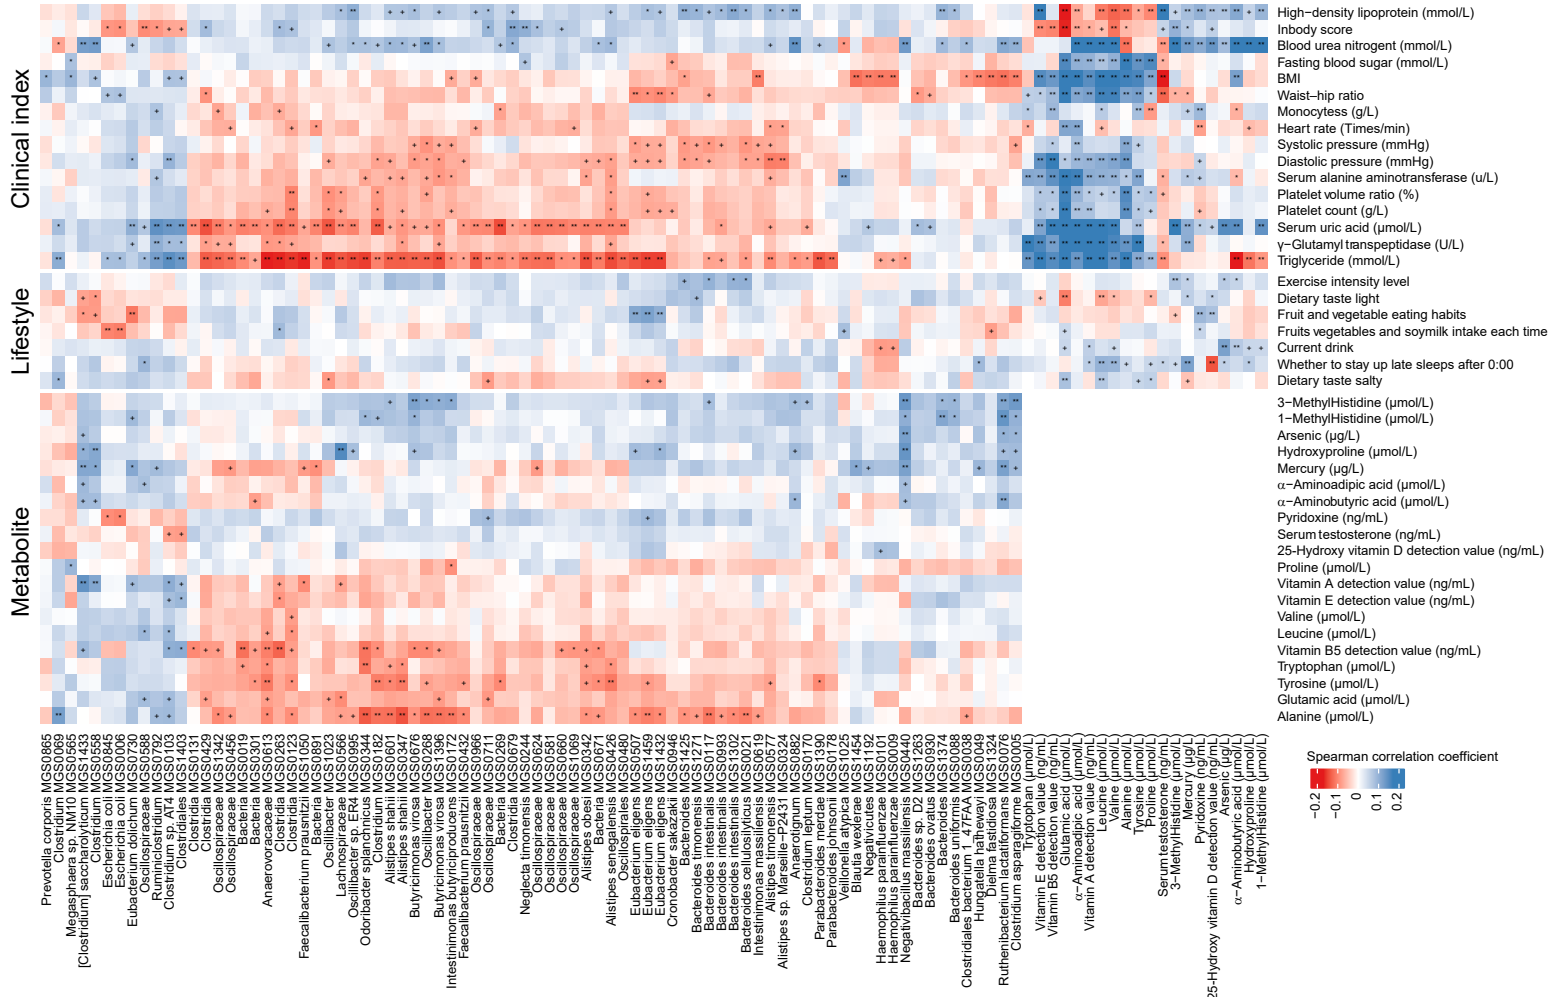

## Physical fitness test

## Exercise

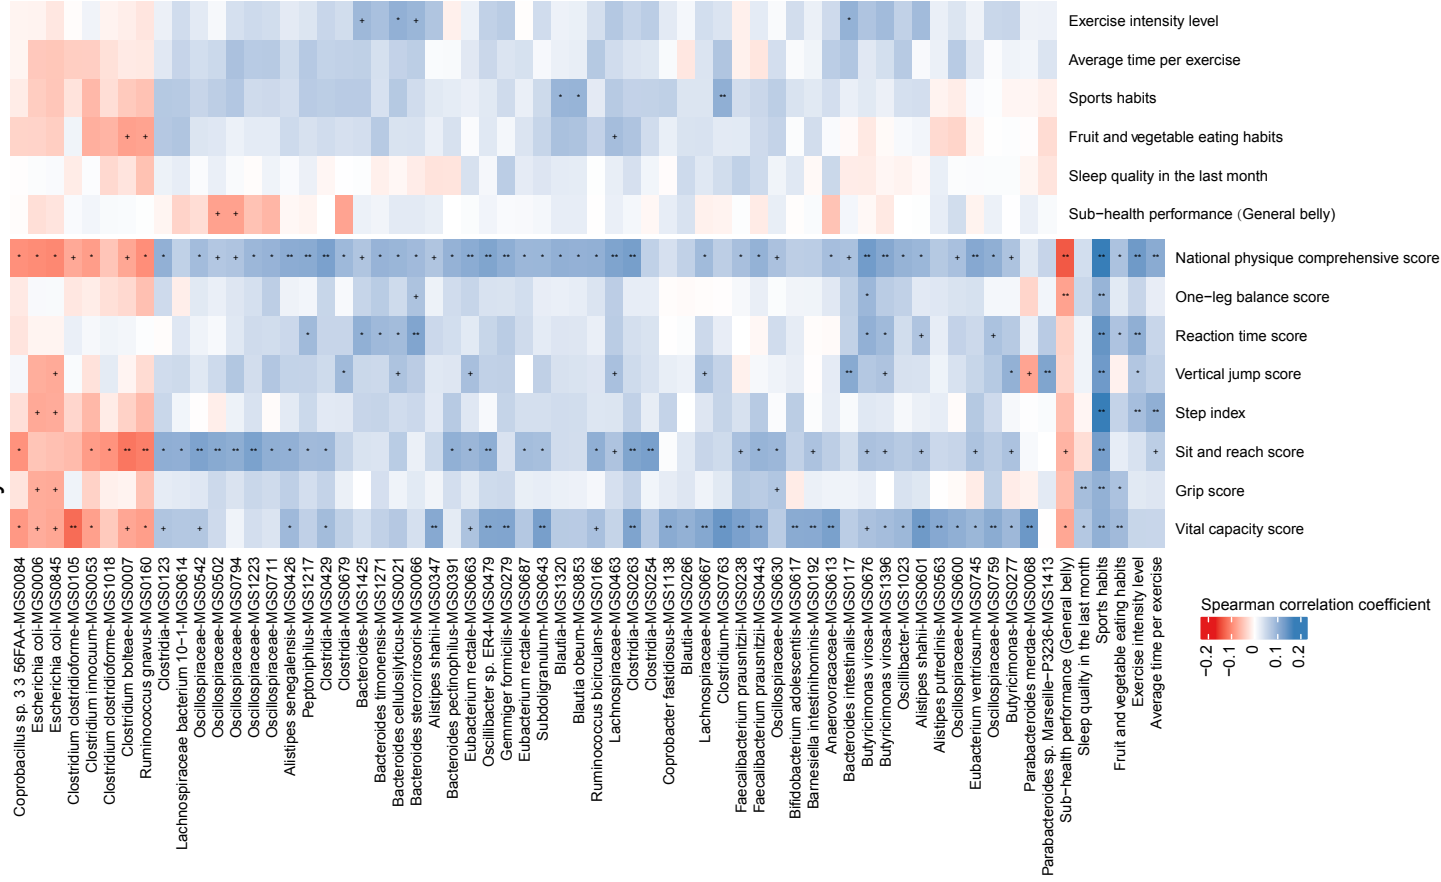



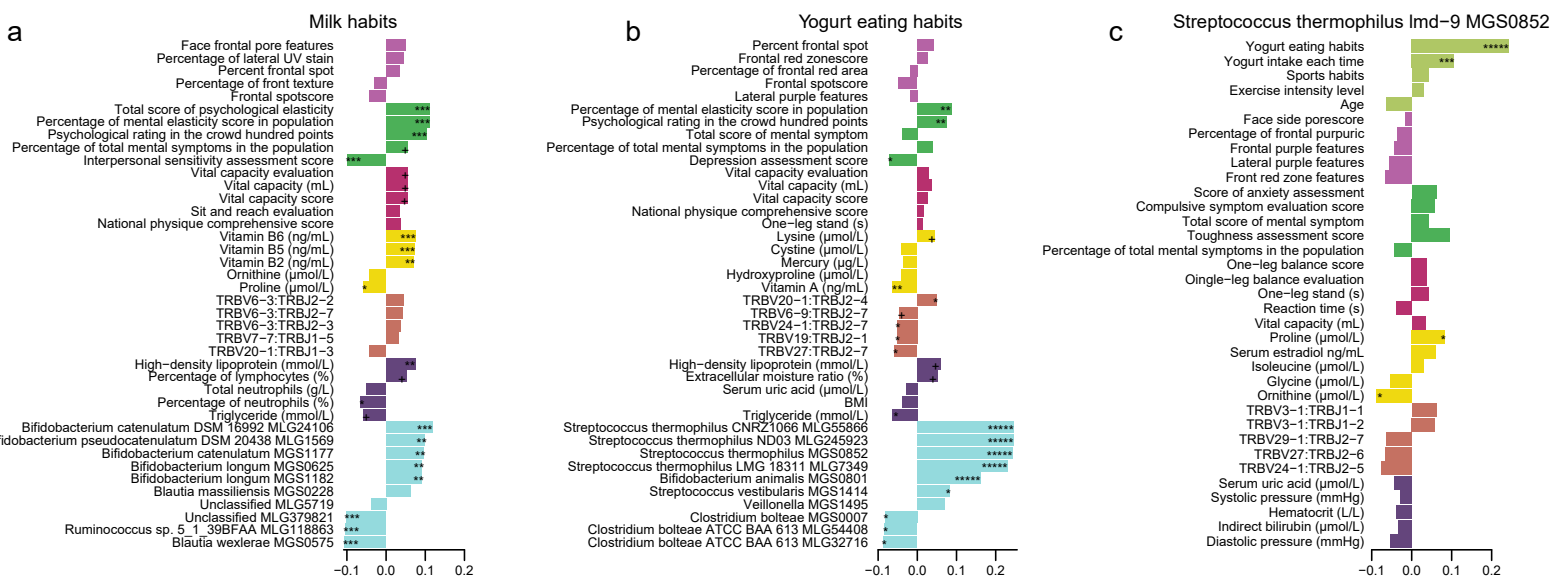

**d Bifidobacterium animalis lactis CNCM I 2494 MLG1576**

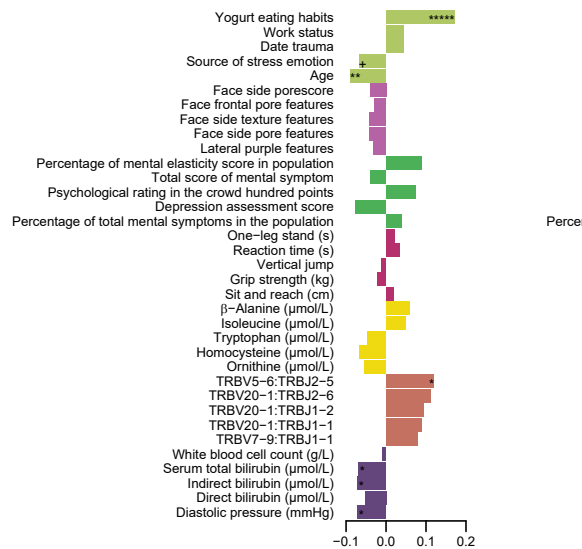

**e Clostridium botetiae ATCC BAA 613 MLG32716**

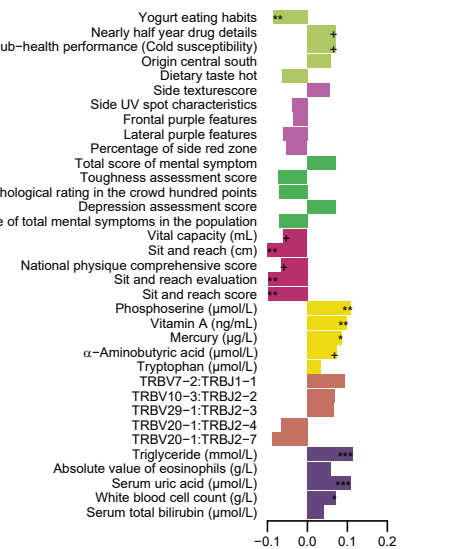

**f Streptococcus thermophilus LMD-9 MGS0852**

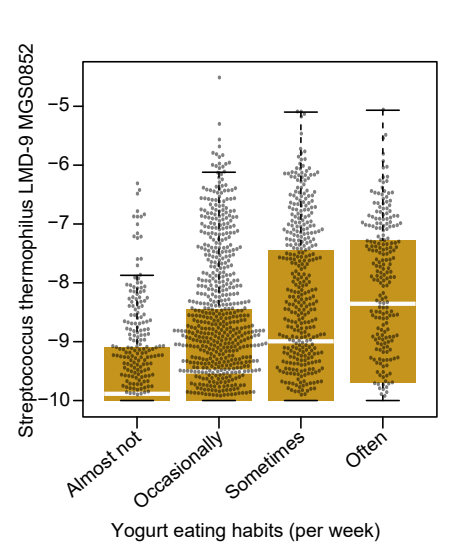

■ Fecal microbiome 
 ■ Medical test 
 ■ Metabolites 
 ■ Physical fitness test 
 ■ Psychological questionnaire 
 ■ Facial skin feature 
 ■ Lifestyle questionnaire 
 ■ Immune indices
